# Supplementary material
Source: publisher figshare collection journal article supplement (https://karger.figshare.com/articles/dataset/_/5896498)
Supplement: Supplementary file 1 [file 1]

| <u>Probeset</u>    | <u>Gene</u> | <u>Annotation</u>                                                                           | <u>Fold Change</u> | <u>FDR</u>    |
|--------------------|-------------|---------------------------------------------------------------------------------------------|--------------------|---------------|
| 206765_at          | KCNJ2       | potassium inwardly-rectifying channel, subfamily J, member 2                                | -2.958             | 3.5615        |
| 213650_at          | GOLGIN-6    | 88-kDa golgi protein                                                                        | -2.631             | 0.0000        |
| 206848_at          | HOXA7       | homeo box A7                                                                                | -2.601             | 0.0000        |
| 213517_at          | PCBP2       | poly(rC) binding protein 2                                                                  | -2.470             | 0.5789        |
| 209006_s_at        | NPD014      | chromosome 1 open reading frame 63                                                          | -2.439             | 0.0000        |
| 215252_at          | DNAJC7      | DnaJ (Hsp40) homolog, subfamily C, member 7                                                 | -2.361             | 2.6670        |
| 215220_s_at        | TPR         | translocated promoter region (to activated MET oncogene)                                    | -2.333             | 0.0000        |
| 217602_at          | PPIA        | peptidylprolyl isomerase A (cyclophilin A)                                                  | -2.243             | 2.1047        |
| 215029_at          |             |                                                                                             | -2.143             | 1.3692        |
| 213593_s_at        | TRA2A       | transformer-2 alpha                                                                         | -2.102             | 2.1047        |
| 213998_s_at        | DDX17       | DEAD (Asp-Glu-Ala-Asp) box polypeptide 17                                                   | -2.062             | 1.3692        |
| 212384_at          | BAT1        | HLA-B associated transcript 1                                                               | -2.050             | 0.6984        |
| 221860_at          |             |                                                                                             | -2.044             | 1.3692        |
| 220940_at          | KIAA1641    | KIAA1641                                                                                    | -2.031             | 2.6670        |
| 214038_at          | CCL8        | chemokine (C-C motif) ligand 8                                                              | -2.023             | 0.6984        |
| 206115_at          | EGR3        | early growth response 3                                                                     | -2.021             | 1.3692        |
| 202379_s_at        | NKTR        | natural killer-tumor recognition sequence                                                   | -2.011             | 0.0000        |
| 213446_s_at        | IQGAP1      | IQ motif containing GTPase activating protein 1                                             | -1.984             | 1.4789        |
| 215338_s_at        | NKTR        | natural killer-tumor recognition sequence                                                   | -1.960             | 2.5562        |
| 201465_s_at        | JUN         | v-jun sarcoma virus 17 oncogene homolog (avian)                                             | -1.955             | 2.6670        |
| 221899_at          | PFAAP5      | phosphonoformate immuno-associated protein 5                                                | -1.940             | 1.3692        |
| 221768_at          | SFPQ        | splicing factor proline/glutamine rich (polypyrimidine tract binding protein associated)    | -1.931             | 0.0000        |
| 210679_x_at        |             |                                                                                             | -1.925             | 2.5562        |
| 221919_at          |             |                                                                                             | -1.917             | 0.0000        |
| 215224_at          | RPL23       | ribosomal protein L23                                                                       | -1.913             | 0.5789        |
| 208930_s_at        | ILF3        | interleukin enhancer binding factor 3, 90kDa                                                | -1.904             | 0.5789        |
| 212847_at          | NEXN        | nexilin (F actin binding protein)                                                           | -1.901             | 3.5615        |
| 209446_s_at        |             |                                                                                             | -1.898             | 1.4789        |
| 221264_s_at        | TARDBP      | TAR DNA binding protein                                                                     | -1.893             | 0.0000        |
| 207953_at          | AD7C-NTF    | neuronal thread protein AD7c-NTF                                                            | -1.886             | 2.5562        |
| 201693_s_at        | EGR1        | early growth response 1                                                                     | -1.867             | 2.5562        |
| 217653_x_at        |             |                                                                                             | -1.860             | 1.3692        |
| 214715_x_at        | ZNF160      | zinc finger protein 160                                                                     | -1.852             | 1.3692        |
| 213700_s_at        | PKM2        | pyruvate kinase, muscle                                                                     | -1.843             | 0.5789        |
| 208624_s_at        | EIF4G1      | eukaryotic translation initiation factor 4 gamma, 1                                         | -1.837             | 0.5789        |
| 208961_s_at        | KLF6        | Kruppel-like factor 6                                                                       | -1.821             | 1.3692        |
| 222214_at          |             |                                                                                             | -1.817             | 2.5562        |
| 217446_x_at        |             |                                                                                             | -1.814             | 1.3692        |
| 217586_x_at        |             |                                                                                             | -1.803             | 1.3692        |
| 206551_x_at        | DRE1        | DRE1 protein                                                                                | -1.801             | 0.0000        |
| 202380_s_at        | NKTR        | natural killer-tumor recognition sequence                                                   | -1.800             | 0.5789        |
| 210425_x_at        | GOLGIN-6    | 88-kDa golgi protein                                                                        | -1.799             | 0.5789        |
| 211947_s_at        | BAT2D1      | BAT2 domain containing 1                                                                    | -1.797             | 0.5789        |
| 217152_at          | NCOR1       | nuclear receptor co-repressor 1                                                             | -1.793             | 2.6670        |
| 212001_at          | SFRS14      | splicing factor, arginine/serine-rich 14                                                    | -1.791             | 1.3692        |
| 220796_x_at        | SLC35E1     | solute carrier family 35, member E1                                                         | -1.790             | 1.3692        |
| 208610_s_at        | SRRM2       | serine/arginine repetitive matrix 2                                                         | -1.785             | 1.3692        |
| 215322_at          |             |                                                                                             | -1.780             | 0.6984        |
| 208835_s_at        | CROP        | cisplatin resistance-associated overexpressed protein                                       | -1.769             | 0.5789        |
| <b>207113_s_at</b> | <b>TNF</b>  | <b>tumor necrosis factor (TNF superfamily, member 2)</b>                                    | <b>-1.765</b>      | <b>0.0000</b> |
| 37796_at           | LRCH4       | leucine-rich repeats and calponin homology (CH) domain containing 4                         | -1.756             | 2.6670        |
| 213359_at          | HNRPD       | heterogeneous nuclear ribonucleoprotein D (AU-rich element RNA binding protein 1, 37kDa)    | -1.750             | 0.0000        |
| 212027_at          | RBM25       | RNA binding motif protein 25                                                                | -1.750             | 0.6984        |
| 207133_x_at        | ALPK1       | alpha-kinase 1                                                                              | -1.749             | 2.6670        |
| 222104_x_at        | GTF2H3      | general transcription factor IIH, polypeptide 3, 34kDa                                      | -1.749             | 0.6984        |
| 207499_x_at        | SMAP-1      | (F) smooth muscle cell associated protein-1                                                 | -1.746             | 2.5562        |
| 215200_x_at        | VIL2        | villin 2 (ezrin)                                                                            | -1.739             | 2.5562        |
| 207436_x_at        | KIAA0894    | KIAA0894 protein                                                                            | -1.736             | 2.1047        |
| 215978_x_at        | LOC15271    | hypothetical protein LOC152719                                                              | -1.732             | 1.3692        |
| 210528_at          | MR1         | (H2Is) major histocompatibility complex, class I-related                                    | -1.728             | 3.5615        |
| 209240_at          | OGT         | O-linked N-acetylglucosamine (GlcNAc) transferase (UDP-N-acetylglucosamine:polypeptide-N-ac | -1.727             | 2.5562        |
| 217679_x_at        |             |                                                                                             | -1.724             | 2.6670        |
| 207768_at          | EGR4        | early growth response 4                                                                     | -1.723             | 4.2531        |
| 222040_at          | HNRPA1      | heterogeneous nuclear ribonucleoprotein A1                                                  | -1.719             | 0.6984        |
| 208246_x_at        | TK2         | thymidine kinase 2, mitochondrial                                                           | -1.718             | 2.5562        |
| 202909_at          | EPM2AIP1    | EPM2A (laforin) interacting protein 1                                                       | -1.717             | 2.6670        |
| 221139_s_at        | CSAD        | cysteine sulfinic acid decarboxylase                                                        | -1.713             | 2.5562        |

| <u>Probeset</u> | <u>Gene</u> | <u>Annotation</u>                                                                                           | <u>Fold Change</u> | <u>FDR</u> |
|-----------------|-------------|-------------------------------------------------------------------------------------------------------------|--------------------|------------|
| 208268_at       | ADAM28      | a disintegrin and metalloproteinase domain 28                                                               | -1.707             | 3.5615     |
| 209403_at       | TBC1D3      | TBC1 domain family, member 3                                                                                | -1.702             | 1.3692     |
| 220954_s_at     | PILRB       | paired immunoglobulin-like type 2 receptor beta                                                             | -1.700             | 2.6670     |
| 215560_x_at     | MTRF1L      | mitochondrial translational release factor 1-like                                                           | -1.699             | 3.5615     |
| 204083_s_at     | TPM2        | tropomyosin 2 (beta)                                                                                        | -1.696             | 1.3692     |
| 208137_x_at     | ZNF611      | zinc finger protein 611                                                                                     | -1.693             | 1.3692     |
| 215628_x_at     | PPP2CA      | protein phosphatase 2 (formerly 2A), catalytic subunit, alpha isoform                                       | -1.692             | 0.5789     |
| 211085_s_at     | STK4        | serine/threonine kinase 4                                                                                   | -1.687             | 0.6984     |
| 214035_x_at     | LOC39949    | LOC399491 protein                                                                                           | -1.687             | 1.4789     |
| 208094_s_at     | MGC1047     | hypothetical protein MGC10471                                                                               | -1.685             | 2.1047     |
| 210769_at       | CNGB1       | cyclic nucleotide gated channel beta 1                                                                      | -1.672             | 2.5562     |
| 215209_at       | SEC24D      | SEC24 related gene family, member D (S. cerevisiae)                                                         | -1.671             | 3.5615     |
| 209258_s_at     | CSPG6       | chondroitin sulfate proteoglycan 6 (bamacan)                                                                | -1.668             | 1.3692     |
| 201404_x_at     | PSMB2       | proteasome (prosome, macropain) subunit, beta type, 2                                                       | -1.666             | 1.3692     |
| 201009_s_at     | TXNIP       | thioredoxin interacting protein                                                                             | -1.663             | 2.1047     |
| 214870_x_at     | NPIP        | nuclear pore complex interacting protein                                                                    | -1.659             | 4.2531     |
| 206681_x_at     | GP2         | glycoprotein 2 (zymogen granule membrane)                                                                   | -1.655             | 2.1047     |
| 214902_x_at     | FLJ42393    | FLJ42393 protein                                                                                            | -1.655             | 1.3692     |
| 217016_x_at     |             |                                                                                                             | -1.655             | 1.3692     |
| 201295_s_at     | WSB1        | WD repeat and SOCS box-containing 1                                                                         | -1.652             | 3.5615     |
| 212000_at       | SFRS14      | splicing factor, arginine/serine-rich 14                                                                    | -1.652             | 2.5562     |
| 214989_x_at     | PLEKHA5     | pleckstrin homology domain containing, family A member 5                                                    | -1.651             | 2.6670     |
| 205255_x_at     | TCF7        | transcription factor 7 (T-cell specific, HMG-box)                                                           | -1.646             | 2.6670     |
| 215555_at       |             |                                                                                                             | -1.640             | 3.5615     |
| 206169_x_at     | RoXaN       | zinc finger CCCH-type containing 7B                                                                         | -1.639             | 4.2531     |
| 206157_at       | PTX3        | pentraxin-related gene, rapidly induced by IL-1 beta                                                        | -1.639             | 1.4789     |
| 212176_at       | C6orf111    | chromosome 6 open reading frame 111                                                                         | -1.635             | 1.3692     |
| 212179_at       | C6orf111    | chromosome 6 open reading frame 111                                                                         | -1.634             | 1.3692     |
| 201101_s_at     | BCLAF1      | BCL2-associated transcription factor 1                                                                      | -1.626             | 2.5562     |
| 219559_at       | C20orf59    | chromosome 20 open reading frame 59                                                                         | -1.624             | 0.0000     |
| 217610_at       |             |                                                                                                             | -1.622             | 4.2531     |
| 214722_at       | NOTCH2N     | Notch homolog 2 (Drosophila) N-terminal like                                                                | -1.621             | 2.1047     |
| 222034_at       | GNB2L1      | guanine nucleotide binding protein (G protein), beta polypeptide 2-like 1                                   | -1.619             | 0.0000     |
| 201294_s_at     | WSB1        | WD repeat and SOCS box-containing 1                                                                         | -1.618             | 2.6670     |
| 222018_at       | NACA        | nascent-polypeptide-associated complex alpha polypeptide                                                    | -1.608             | 0.6984     |
| 209007_s_at     | NPD014      | chromosome 1 open reading frame 63                                                                          | -1.605             | 0.0000     |
| 204387_x_at     | MRP63       | mitochondrial ribosomal protein 63                                                                          | -1.605             | 4.2531     |
| 218000_s_at     | PHLDA1      | pleckstrin homology-like domain, family A, member 1                                                         | -1.604             | 1.4789     |
| 215600_x_at     | FBXW12      | F-box and WD-40 domain protein 12                                                                           | -1.603             | 2.1047     |
| 211930_at       | HNRPA3      | heterogeneous nuclear ribonucleoprotein A3                                                                  | -1.602             | 0.0000     |
| 215434_x_at     | AG1         | AG1 protein                                                                                                 | -1.602             | 2.5562     |
| 215373_x_at     | FLJ12151    | hypothetical protein FLJ12151                                                                               | -1.601             | 2.1047     |
| 220483_s_at     | RNF19       | ring finger protein 19                                                                                      | -1.598             | 2.5562     |
| 210561_s_at     | WSB1        | WD repeat and SOCS box-containing 1                                                                         | -1.596             | 1.3692     |
| 217717_s_at     | YWHAB       | tyrosine 3-monooxygenase/tryptophan 5-monooxygenase activation protein, beta polypeptide                    | -1.593             | 2.6670     |
| 220252_x_at     | CXorf21     | chromosome X open reading frame 21                                                                          | -1.593             | 4.2531     |
| 212033_at       | RBM25       | RNA binding motif protein 25                                                                                | -1.592             | 1.4789     |
| 222187_x_at     | G3BP        | Ras-GTPase-activating protein SH3-domain-binding protein                                                    | -1.588             | 2.6670     |
| 201070_x_at     | SF3B1       | splicing factor 3b, subunit 1, 155kDa                                                                       | -1.585             | 3.5615     |
| 216135_at       | MGC35041    | hypothetical protein MGC35048                                                                               | -1.585             | 2.6670     |
| 212980_at       | USP34       | ubiquitin specific protease 34                                                                              | -1.583             | 3.5615     |
| 216187_x_at     | KNS2        | kinesin 2 60/70kDa                                                                                          | -1.577             | 4.2531     |
| 215893_x_at     |             |                                                                                                             | -1.575             | 2.5562     |
| 222207_x_at     |             |                                                                                                             | -1.575             | 0.0000     |
| 206792_x_at     | PDE4C       | phosphodiesterase 4C, cAMP-specific (phosphodiesterase E1 dunce homolog, Drosophila)                        | -1.574             | 1.4789     |
| 212240_s_at     | PIK3R1      | phosphoinositide-3-kinase, regulatory subunit 1 (p85 alpha)                                                 | -1.573             | 2.6670     |
| 204533_at       | CXCL10      | chemokine (C-X-C motif) ligand 10                                                                           | -1.573             | 1.3692     |
| 215604_x_at     | UBE2D2      | ubiquitin-conjugating enzyme E2D 2 (UBC4/5 homolog, yeast)                                                  | -1.572             | 2.1047     |
| 205967_at       | HIST1H4C    | histone 1, H4c                                                                                              | -1.567             | 3.5615     |
| 220035_at       | NUP210      | nucleoporin 210kDa                                                                                          | -1.567             | 3.5615     |
| 201085_s_at     | SON         | SON DNA binding protein                                                                                     | -1.567             | 0.6984     |
| 214871_x_at     | SMARCE1     | SWI/SNF related, matrix associated, actin dependent regulator of chromatin, subfamily e, member 1           | -1.564             | 3.5615     |
| 214656_x_at     | MYO1C       | myosin IC                                                                                                   | -1.560             | 2.5562     |
| 219290_x_at     | DAPP1       | dual adaptor of phosphotyrosine and 3-phosphoinositides                                                     | -1.557             | 2.5562     |
| 207564_x_at     | OGT         | O-linked N-acetylglucosamine (GlcNAc) transferase (UDP-N-acetylglucosamine:polypeptide-N-acetyltransferase) | -1.557             | 2.6670     |
| 215208_x_at     | RPL35A      | ribosomal protein L35a                                                                                      | -1.555             | 1.3692     |
| 211008_s_at     | UBE2I       | ubiquitin-conjugating enzyme E2I (UBC9 homolog, yeast)                                                      | -1.552             | 2.1047     |

| <u>Probeset</u> | <u>Gene</u> | <u>Annotation</u>                                                                                   | <u>Fold Change</u> | <u>FDR</u> |
|-----------------|-------------|-----------------------------------------------------------------------------------------------------|--------------------|------------|
| 64371_at        | SFRS14      | splicing factor, arginine/serine-rich 14                                                            | -1.548             | 2.6670     |
| 211944_at       | BAT2D1      | BAT2 domain containing 1                                                                            | -1.547             | 1.3692     |
| 217526_at       | NFATC2IP    | nuclear factor of activated T-cells, cytoplasmic, calcineurin-dependent 2 interacting protein       | -1.545             | 2.6670     |
| 210069_at       | CPT1B       | carnitine palmitoyltransferase 1B (muscle)                                                          | -1.541             | 0.0000     |
| 208306_x_at     | HLA-DRB1    | major histocompatibility complex, class II, DR beta 1                                               | -1.541             | 3.5615     |
| 206723_s_at     | EDG4        | endothelial differentiation, lysophosphatidic acid G-protein-coupled receptor, 4                    | -1.539             | 0.5789     |
| 212975_at       | KIAA0870    | KIAA0870 protein                                                                                    | -1.538             | 1.3692     |
| 215281_x_at     | POGZ        | pogo transposable element with ZNF domain                                                           | -1.536             | 2.6670     |
| 214016_s_at     | SFPQ        | splicing factor proline/glutamine rich (polypyrimidine tract binding protein associated)            | -1.535             | 0.0000     |
| 217701_x_at     | ATRX        | alpha thalassemia/mental retardation syndrome X-linked (RAD54 homolog, <i>S. cerevisiae</i> )       | -1.534             | 0.0000     |
| 203215_s_at     | MYO6        | myosin VI                                                                                           | -1.534             | 2.5562     |
| 208705_s_at     | EIF5        | eukaryotic translation initiation factor 5                                                          | -1.532             | 0.0000     |
| 205370_x_at     | DBT         | dihydrolipoamide branched chain transacylase E2                                                     | -1.530             | 1.3692     |
| 217862_at       | PIAS1       | protein inhibitor of activated STAT, 1                                                              | -1.528             | 3.5615     |
| 214785_at       | VPS13A      | vacuolar protein sorting 13A (yeast)                                                                | -1.524             | 0.5789     |
| 206500_s_at     | C14orf106   | chromosome 14 open reading frame 106                                                                | -1.524             | 2.5562     |
| 207365_x_at     | USP34       | ubiquitin specific protease 34                                                                      | -1.522             | 0.5789     |
| 218634_at       | PHLDA3      | pleckstrin homology-like domain, family A, member 3                                                 | -1.519             | 2.1047     |
| 213459_at       | RPL37A      | ribosomal protein L37a                                                                              | -1.517             | 2.6670     |
| 214911_s_at     | BRD2        | bromodomain containing 2                                                                            | -1.516             | 2.6670     |
| 217137_x_at     |             |                                                                                                     | -1.512             | 1.3692     |
| 219387_at       | KIAA1212    | KIAA1212                                                                                            | -1.510             | 3.5615     |
| 215184_at       | DAPK2       | death-associated protein kinase 2                                                                   | -1.508             | 0.0000     |
| 220249_at       | HYAL4       | hyaluronoglucosaminidase 4                                                                          | -1.507             | 3.5615     |
| 208685_x_at     | BRD2        | bromodomain containing 2                                                                            | -1.507             | 2.5562     |
| 212177_at       | C6orf111    | chromosome 6 open reading frame 111                                                                 | -1.506             | 0.6984     |
| 222380_s_at     |             |                                                                                                     | -1.505             | 3.5615     |
| 207730_x_at     | HDGF2       | hepatoma-derived growth factor-related protein 2                                                    | -1.505             | 0.5789     |
| 212036_s_at     | PNN         | pinin, desmosome associated protein                                                                 | -1.502             | 0.5789     |
| 210210_at       | MPZL1       | myelin protein zero-like 1                                                                          | -1.501             | 0.0000     |
| 208965_s_at     | IFI16       | interferon, gamma-inducible protein 16                                                              | -1.499             | 1.3692     |
| 217490_at       |             |                                                                                                     | -1.498             | 2.5562     |
| 217529_at       |             |                                                                                                     | -1.498             | 4.2531     |
| 215387_x_at     | GPC6        | glypican 6                                                                                          | -1.498             | 1.4789     |
| 215359_x_at     | ZNF44       | zinc finger protein 44 (KOX 7)                                                                      | -1.497             | 0.5789     |
| 216147_at       | 11-Sep      | septin 11                                                                                           | -1.496             | 1.3692     |
| 205187_at       | SMAD5       | SMAD, mothers against DPP homolog 5 ( <i>Drosophila</i> )                                           | -1.496             | 2.1047     |
| 211374_x_at     |             |                                                                                                     | -1.495             | 1.3692     |
| 214188_at       | HIS1        | hexamethylene bis-acetamide inducible 1                                                             | -1.494             | 1.3692     |
| 220071_x_at     | C15orf25    | chromosome 15 open reading frame 25                                                                 | -1.494             | 2.5562     |
| 207711_at       | KIAA0889    | KIAA0889 protein                                                                                    | -1.491             | 2.6670     |
| 220720_x_at     | FLJ14346    | hypothetical protein FLJ14346                                                                       | -1.490             | 1.3692     |
| 220046_s_at     | CCNL1       | cyclin L1                                                                                           | -1.488             | 2.1047     |
| 213956_at       | CAP350      | centrosome-associated protein 350                                                                   | -1.487             | 3.5615     |
| 215024_at       | C7orf28B    | chromosome 7 open reading frame 28B                                                                 | -1.486             | 2.5562     |
| 201917_s_at     | FLJ10618    | solute carrier family 25, member 36                                                                 | -1.485             | 2.6670     |
| 214092_x_at     | SFRS14      | splicing factor, arginine/serine-rich 14                                                            | -1.484             | 0.5789     |
| 210943_s_at     | LYST        | lysosomal trafficking regulator                                                                     | -1.483             | 4.2531     |
| 214594_x_at     | ATP8B1      | ATPase, Class I, type 8B, member 1                                                                  | -1.481             | 2.6670     |
| 207563_s_at     | OGT         | O-linked N-acetylglucosamine (GlcNAc) transferase (UDP-N-acetylglucosamine:polypeptide-N-ac         | -1.478             | 0.0000     |
| 215462_at       | LOC14947    | hypothetical protein LOC149478                                                                      | -1.476             | 0.0000     |
| 208370_s_at     | DSCR1       | Down syndrome critical region gene 1                                                                | -1.474             | 0.5789     |
| 215346_at       | CD40        | CD40 antigen (TNF receptor superfamily member 5)                                                    | -1.474             | 2.6670     |
| 217878_s_at     | CDC27       | cell division cycle 27                                                                              | -1.473             | 4.2531     |
| 208159_x_at     | DDX11       | DEAD/H (Asp-Glu-Ala-Asp/His) box polypeptide 11 (CHL1-like helicase homolog, <i>S. cerevisiae</i> ) | -1.472             | 1.3692     |
| 211452_x_at     | LRRFIP1     | leucine rich repeat (in FLII) interacting protein 1                                                 | -1.472             | 2.5562     |
| 202509_s_at     | TNFAIP2     | tumor necrosis factor, alpha-induced protein 2                                                      | -1.470             | 0.5789     |
| 221740_x_at     | LOC47417    | c114 SLIT-like testicular protein                                                                   | -1.469             | 1.4789     |
| 207135_at       | HTR2A       | 5-hydroxytryptamine (serotonin) receptor 2A                                                         | -1.467             | 2.5562     |
| 215824_at       | NUDT7       | nudix (nucleoside diphosphate linked moiety X)-type motif 7                                         | -1.465             | 3.5615     |
| 219627_at       | FLJ12700    | hypothetical protein FLJ12700                                                                       | -1.465             | 2.5562     |
| 216310_at       | TAOK1       | TAO kinase 1                                                                                        | -1.465             | 2.5562     |
| 221833_at       | LONP        | peroxisomal lon protease                                                                            | -1.464             | 2.6670     |
| 222363_at       |             |                                                                                                     | -1.463             | 0.0000     |
| 214163_at       | C1orf41     | chromosome 1 open reading frame 41                                                                  | -1.462             | 1.3692     |
| 210230_at       |             |                                                                                                     | -1.462             | 3.5615     |
| 214463_x_at     | HIST1H4J    | histone 1, H4j                                                                                      | -1.459             | 3.5615     |

| <u>Probeset</u> | <u>Gene</u>  | <u>Annotation</u>                                                                                           | <u>Fold Change</u> | <u>FDR</u> |
|-----------------|--------------|-------------------------------------------------------------------------------------------------------------|--------------------|------------|
| 213574_s_at     | KPNB1        | karyopherin (importin) beta 1                                                                               | -1.457             | 2.5562     |
| 215232_at       | KIAA0672     | KIAA0672 gene product                                                                                       | -1.456             | 3.5615     |
| 215864_at       | INPP4B       | inositol polyphosphate-4-phosphatase, type II, 105kDa                                                       | -1.455             | 0.5789     |
| 214475_x_at     | CAPN3        | calpain 3, (p94)                                                                                            | -1.455             | 0.5789     |
| 213505_s_at     | SFRS14       | splicing factor, arginine/serine-rich 14                                                                    | -1.453             | 1.4789     |
| 209101_at       | CTGF         | connective tissue growth factor                                                                             | -1.453             | 0.6984     |
| 208149_x_at     | DDX11        | DEAD/H (Asp-Glu-Ala-Asp/His) box polypeptide 11 (CHL1-like helicase homolog, <i>S. cerevisiae</i> )         | -1.453             | 0.0000     |
| 209508_x_at     | CFLAR        | CASP8 and FADD-like apoptosis regulator                                                                     | -1.453             | 0.6984     |
| 217579_x_at     | ARL6IP2      | ADP-ribosylation factor-like 6 interacting protein 2                                                        | -1.452             | 2.5562     |
| 203147_s_at     | TRIM14       | tripartite motif-containing 14                                                                              | -1.451             | 2.1047     |
| 210686_x_at     | SLC25A16     | solute carrier family 25 (mitochondrial carrier; Graves disease autoantigen), member 16                     | -1.450             | 2.6670     |
| 219678_x_at     | DCLRE1C      | DNA cross-link repair 1C (PSO2 homolog, <i>S. cerevisiae</i> )                                              | -1.450             | 1.3692     |
| 215308_at       | G22P1        | X-ray repair complementing defective repair in Chinese hamster cells 6 (Ku autoantigen, 70kDa)              | -1.449             | 0.5789     |
| 201694_s_at     | EGR1         | early growth response 1                                                                                     | -1.448             | 2.5562     |
| 218155_x_at     | FLJ10534     | hypothetical protein FLJ10534                                                                               | -1.446             | 1.3692     |
| 206827_s_at     | TRPV6        | transient receptor potential cation channel, subfamily V, member 6                                          | -1.446             | 4.2531     |
| 213434_at       | EPIM         | epimorphin                                                                                                  | -1.446             | 4.2531     |
| 204103_at       | CCL4         | chemokine (C-C motif) ligand 4                                                                              | -1.446             | 0.0000     |
| 219202_at       | RHBDL6       | rhomboid, veinlet-like 6 ( <i>Drosophila</i> )                                                              | -1.445             | 2.1047     |
| 215490_at       | LOC20020     | chromosome 1 open reading frame 69                                                                          | -1.445             | 1.4789     |
| 211127_x_at     | EDA          | ectodysplasin A                                                                                             | -1.444             | 1.3692     |
| 211040_x_at     | GTSE1        | G-2 and S-phase expressed 1                                                                                 | -1.443             | 1.4789     |
| 212188_at       | KCTD12       | potassium channel tetramerisation domain containing 12                                                      | -1.441             | 4.2531     |
| 204158_s_at     | TCIRG1       | T-cell, immune regulator 1, ATPase, H <sup>+</sup> transporting, lysosomal V0 protein a isoform 3           | -1.441             | 2.5562     |
| 201450_s_at     | TIA1         | TIA1 cytotoxic granule-associated RNA binding protein                                                       | -1.440             | 0.0000     |
| 213649_at       | SFRS7        | splicing factor, arginine/serine-rich 7, 35kDa                                                              | -1.438             | 2.1047     |
| 215179_x_at     | PGF          | placental growth factor, vascular endothelial growth factor-related protein                                 | -1.437             | 2.1047     |
| 213936_x_at     | SFTPB        | surfactant, pulmonary-associated protein B                                                                  | -1.437             | 2.6670     |
| 204190_at       | C13orf22     | chromosome 13 open reading frame 22                                                                         | -1.435             | 2.1047     |
| 208082_x_at     |              |                                                                                                             | -1.431             | 2.5562     |
| 217501_at       | WDR39        | WD repeat domain 39                                                                                         | -1.430             | 2.6670     |
| 214718_at       | ODAG         | GATA zinc finger domain containing 1                                                                        | -1.430             | 0.6984     |
| 35436_at        | GOLGA2       | golgi autoantigen, golgin subfamily a, 2                                                                    | -1.430             | 0.5789     |
| 216745_x_at     | LRCH1        | leucine-rich repeats and calponin homology (CH) domain containing 1                                         | -1.429             | 0.5789     |
| 219957_at       | RUFY2        | RUN and FYVE domain containing 2                                                                            | -1.427             | 2.1047     |
| 212307_s_at     | OGT          | O-linked N-acetylglucosamine (GlcNAc) transferase (UDP-N-acetylglucosamine:polypeptide-N-acetyltransferase) | -1.427             | 4.2531     |
| 216555_at       |              |                                                                                                             | -1.427             | 2.5562     |
| 201774_s_at     | CNAP1        | chromosome condensation-related SMC-associated protein 1                                                    | -1.427             | 1.3692     |
| 200835_s_at     | MAP4         | microtubule-associated protein 4                                                                            | -1.424             | 3.5615     |
| 204650_s_at     | APBB3        | amyloid beta (A4) precursor protein-binding, family B, member 3                                             | -1.424             | 2.6670     |
| 203229_s_at     | CLK2         | CDC-like kinase 2                                                                                           | -1.422             | 0.0000     |
| 220582_at       |              |                                                                                                             | -1.421             | 1.3692     |
| 208798_x_at     | GOLGIN-6     | 88-kDa golgi protein                                                                                        | -1.421             | 0.0000     |
| 205867_at       | PTPN11       | protein tyrosine phosphatase, non-receptor type 11 (Noonan syndrome 1)                                      | -1.419             | 4.2531     |
| 211316_x_at     | CFLAR        | CASP8 and FADD-like apoptosis regulator                                                                     | -1.418             | 2.1047     |
| 221499_s_at     | STX16        | syntaxin 16                                                                                                 | -1.415             | 1.4789     |
| 217497_at       | ECGF1        | endothelial cell growth factor 1 (platelet-derived)                                                         | -1.414             | 0.5789     |
| 212007_at       | UBXD2        | UBX domain containing 2                                                                                     | -1.413             | 1.3692     |
| 214501_s_at     | H2AFY        | H2A histone family, member Y                                                                                | -1.413             | 0.5789     |
| 202354_s_at     | GTF2F1       | general transcription factor IIF, polypeptide 1, 74kDa                                                      | -1.413             | 2.1047     |
| 218521_s_at     | FLJ11011     | hypothetical protein FLJ11011                                                                               | -1.413             | 2.6670     |
| 49306_at        | RASSF4       | Ras association (RalGDS/AF-6) domain family 4                                                               | -1.413             | 0.5789     |
| 209928_s_at     | MSC          | musculin (activated B-cell factor-1)                                                                        | -1.412             | 2.5562     |
| 213718_at       | RBM4         | RNA binding motif protein 4                                                                                 | -1.410             | 0.5789     |
| 217867_x_at     | BACE2        | beta-site APP-cleaving enzyme 2                                                                             | -1.409             | 0.6984     |
| 221506_s_at     | TNPO2        | transportin 2 (importin 3, karyopherin beta 2b)                                                             | -1.409             | 1.3692     |
| 212654_at       | TPM2         | tropomyosin 2 (beta)                                                                                        | -1.408             | 2.5562     |
| 203491_s_at     | PIG8         | translokain                                                                                                 | -1.407             | 3.5615     |
| 203632_s_at     | GPRC5B       | G protein-coupled receptor, family C, group 5, member B                                                     | -1.407             | 3.5615     |
| 211304_x_at     | KCNJ5        | potassium inwardly-rectifying channel, subfamily J, member 5                                                | -1.407             | 2.1047     |
| 221850_x_at     | CTGLF1       | centaurin, gamma-like family, member 1                                                                      | -1.406             | 2.6670     |
| 222244_s_at     | FLJ20618     | taurine upregulated gene 1                                                                                  | -1.406             | 0.0000     |
| 210840_s_at     | IQGAP1       | IQ motif containing GTPase activating protein 1                                                             | -1.405             | 2.6670     |
| 212030_at       | RBM25        | RNA binding motif protein 25                                                                                | -1.404             | 1.4789     |
| 216765_at       | MAP2K5       | mitogen-activated protein kinase 5                                                                          | -1.404             | 2.1047     |
| 218683_at       | PTBP2        | polypyrimidine tract binding protein 2                                                                      | -1.404             | 4.2531     |
| 217713_x_at     | DKFZP566N034 | hypothetical protein DKFZp566N034                                                                           | -1.403             | 1.4789     |

| <u>Probeset</u> | <u>Gene</u> | <u>Annotation</u>                                                                 | <u>Fold Change</u> | <u>FDR</u> |
|-----------------|-------------|-----------------------------------------------------------------------------------|--------------------|------------|
| 206700_s_at     | SMCY        | Smcy homolog, Y-linked (mouse)                                                    | -1.401             | 1.3692     |
| 215583_at       | KIAA0792    | KIAA0792                                                                          | -1.398             | 4.2531     |
| 214500_at       | H2AFY       | H2A histone family, member Y                                                      | -1.396             | 3.5615     |
| 219117_s_at     | FKBP11      | FK506 binding protein 11, 19 kDa                                                  | -1.393             | 2.6670     |
| 206661_at       | DRF1        | Dbf4-related factor 1                                                             | -1.392             | 2.1047     |
| 207598_x_at     | XRCC2       | X-ray repair complementing defective repair in Chinese hamster cells 2            | -1.389             | 2.6670     |
| 207631_at       | NBR2        | neighbor of BRCA1 gene 2                                                          | -1.388             | 0.6984     |
| 214982_at       |             |                                                                                   | -1.388             | 3.5615     |
| 208273_at       | SBZF3       | zinc finger protein 695                                                           | -1.387             | 1.4789     |
| 201296_s_at     | WSB1        | WD repeat and SOCS box-containing 1                                               | -1.387             | 1.4789     |
| 219392_x_at     | FLJ11029    | hypothetical protein FLJ11029                                                     | -1.385             | 0.6984     |
| 215636_at       | RBAF600     | retinoblastoma-associated factor 600                                              | -1.384             | 2.6670     |
| 204234_s_at     | ZNF195      | zinc finger protein 195                                                           | -1.383             | 1.3692     |
| 212684_at       | ZNF3        | zinc finger protein 3 (A8-51)                                                     | -1.383             | 0.0000     |
| 202978_s_at     | ZF          | HCF-binding transcription factor Zhangfei                                         | -1.382             | 2.6670     |
| 215070_x_at     | RABGAP1     | RAB GTPase activating protein 1                                                   | -1.382             | 0.5789     |
| 221971_x_at     |             |                                                                                   | -1.382             | 2.6670     |
| 213546_at       | DKFZp586    | hypothetical protein DKFZp5861420                                                 | -1.382             | 1.3692     |
| 214816_x_at     | MGC3202     | hypothetical protein MGC32020                                                     | -1.381             | 2.5562     |
| 208900_s_at     | TOP1        | topoisomerase (DNA) I                                                             | -1.380             | 2.6670     |
| 213577_at       |             |                                                                                   | -1.380             | 2.6670     |
| 213364_s_at     | SNX1        | sorting nexin 1                                                                   | -1.380             | 1.4789     |
| 201728_s_at     | KIAA0100    | KIAA0100 gene product                                                             | -1.379             | 2.1047     |
| 218067_s_at     | FLJ10154    | hypothetical protein FLJ10154                                                     | -1.377             | 2.6670     |
| 205178_s_at     | RBBP6       | retinoblastoma binding protein 6                                                  | -1.377             | 2.6670     |
| 215529_x_at     | C21orf106   | chromosome 21 open reading frame 106                                              | -1.377             | 1.3692     |
| 217591_at       | SKIL        | SKI-like                                                                          | -1.377             | 2.1047     |
| 216449_x_at     | TRA1        | tumor rejection antigen (gp96) 1                                                  | -1.376             | 2.5562     |
| 212337_at       | TI-227H     | hypothetical protein TI-227H                                                      | -1.373             | 1.3692     |
| 214132_at       | ATP5C1      | ATP synthase, H+ transporting, mitochondrial F1 complex, gamma polypeptide 1      | -1.373             | 0.0000     |
| 201914_s_at     | SEC63       | SEC63-like (S. cerevisiae)                                                        | -1.373             | 4.2531     |
| 201746_at       | TP53        | tumor protein p53 (Li-Fraumeni syndrome)                                          | -1.371             | 4.2531     |
| 219341_at       | CLN8        | ceroid-lipofuscinosis, neuronal 8 (epilepsy, progressive with mental retardation) | -1.370             | 3.5615     |
| 202127_at       | PRPF4B      | PRP4 pre-mRNA processing factor 4 homolog B (yeast)                               | -1.368             | 1.3692     |
| 205114_s_at     | CCL3        | chemokine (C-C motif) ligand 3                                                    | -1.367             | 0.0000     |
| 213018_at       | ODAG        | GATA zinc finger domain containing 1                                              | -1.364             | 2.5562     |
| 211411_at       | FUT1        | fucosyltransferase 1 (galactoside 2-alpha-L-fucosyltransferase)                   | -1.363             | 0.5789     |
| 212783_at       | RBBP6       | retinoblastoma binding protein 6                                                  | -1.362             | 2.5562     |
| 217914_at       | TPCN1       | two pore segment channel 1                                                        | -1.359             | 2.1047     |
| 220675_s_at     | ADPN        | adiponutrin                                                                       | -1.359             | 2.5562     |
| 202813_at       | TARBP1      | TAR (HIV) RNA binding protein 1                                                   | -1.359             | 4.2531     |
| 216598_s_at     | CCL2        | chemokine (C-C motif) ligand 2                                                    | -1.355             | 2.1047     |
| 205343_at       | SULT1C1     | sulfotransferase family, cytosolic, 1C, member 1                                  | -1.355             | 2.1047     |
| 215588_x_at     | RIOK3       | RIO kinase 3 (yeast)                                                              | -1.354             | 1.4789     |
| 40569_at        | ZNF42       | zinc finger protein 42 (myeloid-specific retinoic acid-responsive)                | -1.354             | 4.2531     |
| 219571_s_at     | ZNF12       | zinc finger protein 12                                                            | -1.354             | 1.3692     |
| 204453_at       | ZNF84       | zinc finger protein 84 (HPF2)                                                     | -1.352             | 0.6984     |
| 208238_x_at     |             |                                                                                   | -1.352             | 2.1047     |
| 218740_s_at     | CDK5RAP     | CDK5 regulatory subunit associated protein 3                                      | -1.349             | 2.5562     |
| 209383_at       | DDIT3       | DNA-damage-inducible transcript 3                                                 | -1.348             | 3.5615     |
| 210873_x_at     | APOBEC3     | apolipoprotein B mRNA editing enzyme, catalytic polypeptide-like 3A               | -1.347             | 2.6670     |
| 214808_at       |             |                                                                                   | -1.347             | 0.0000     |
| 204573_at       | CROT        | carnitine O-octanoyltransferase                                                   | -1.346             | 4.2531     |
| 212551_at       | CAP2        | CAP, adenylate cyclase-associated protein, 2 (yeast)                              | -1.346             | 2.6670     |
| 210136_at       | MBP         | myelin basic protein                                                              | -1.346             | 1.3692     |
| 215012_at       | ZNF451      | zinc finger protein 451                                                           | -1.345             | 1.4789     |
| 215067_x_at     | PRDX2       | peroxiredoxin 2                                                                   | -1.345             | 2.6670     |
| 210623_at       | LOC51035    | ORF                                                                               | -1.345             | 2.1047     |
| 213408_s_at     | PIK4CA      | phosphatidylinositol 4-kinase, catalytic, alpha polypeptide                       | -1.345             | 1.3692     |
| 212725_s_at     | TI-227H     | hypothetical protein TI-227H                                                      | -1.342             | 0.0000     |
| 212468_at       | SPAG9       | sperm associated antigen 9                                                        | -1.342             | 3.5615     |
| 215364_s_at     | KIAA0467    | KIAA0467                                                                          | -1.341             | 3.5615     |
| 208662_s_at     | TTC3        | tetratricopeptide repeat domain 3                                                 | -1.341             | 4.2531     |
| 204285_s_at     | PMAIP1      | phorbol-12-myristate-13-acetate-induced protein 1                                 | -1.340             | 1.3692     |
| 218808_at       | DALRD3      | DALR anticodon binding domain containing 3                                        | -1.338             | 4.2531     |
| 201613_s_at     | AP1G2       | adaptor-related protein complex 1, gamma 2 subunit                                | -1.336             | 2.6670     |
| 221920_s_at     | MSCP        | solute carrier family 25, member 37                                               | -1.336             | 2.5562     |

| <u>Probeset</u>      | <u>Gene</u> | <u>Annotation</u>                                                                               | <u>Fold Change</u> | <u>FDR</u> |
|----------------------|-------------|-------------------------------------------------------------------------------------------------|--------------------|------------|
| 207081_s_at          | PIK4CA      | phosphatidylinositol 4-kinase, catalytic, alpha polypeptide                                     | -1.336             | 2.1047     |
| 203796_s_at          | BCL7A       | B-cell CLL/lymphoma 7A                                                                          | -1.336             | 2.6670     |
| 37566_at             | KIAA1045    | KIAA1045                                                                                        | -1.336             | 1.4789     |
| 207941_s_at          | RNPC2       | RNA-binding region (RNP1, RRM) containing 2                                                     | -1.335             | 0.5789     |
| 210580_x_at          | SULT1A3     | sulfotransferase family, cytosolic, 1A, phenol-preferring, member 3                             | -1.335             | 3.5615     |
| 208042_at            | AGGF1       | angiogenic factor with G patch and FHA domains 1                                                | -1.334             | 2.5562     |
| 221988_at            | MGC2747     | hypothetical protein MGC2747                                                                    | -1.334             | 4.2531     |
| 213311_s_at          | KIAA1049    | KIAA1049 protein                                                                                | -1.334             | 0.0000     |
| 204071_s_at          | TOPORS      | topoisomerase I binding, arginine/serine-rich                                                   | -1.334             | 4.2531     |
| 207605_x_at          | ZNF117      | zinc finger protein 117 (HPF9)                                                                  | -1.334             | 2.5562     |
| 203938_s_at          | TAF1C       | TATA box binding protein (TBP)-associated factor, RNA polymerase I, C, 110kDa                   | -1.332             | 3.5615     |
| 211769_x_at          | TDE1        | tumor differentially expressed 1                                                                | -1.332             | 4.2531     |
| 207673_at            | NPHS1       | nephrosis 1, congenital, Finnish type (nephrin)                                                 | -1.330             | 2.6670     |
| 211004_s_at          | ALDH3B1     | aldehyde dehydrogenase 3 family, member B1                                                      | -1.328             | 3.5615     |
| 206929_s_at          | NFIC        | nuclear factor I/C (CCAAT-binding transcription factor)                                         | -1.326             | 1.4789     |
| 221961_at            | CLCN7       | chloride channel 7                                                                              | -1.325             | 1.3692     |
| 215609_at            | STARD7      | START domain containing 7                                                                       | -1.323             | 1.3692     |
| 218362_s_at          | KIAA1008    | KIAA1008                                                                                        | -1.323             | 4.2531     |
| 210410_s_at          | MSH5        | mutS homolog 5 (E. coli)                                                                        | -1.322             | 2.5562     |
| 200686_s_at          | SFRS11      | splicing factor, arginine/serine-rich 11                                                        | -1.322             | 0.0000     |
| 214499_s_at          | BCLAF1      | BCL2-associated transcription factor 1                                                          | -1.320             | 0.6984     |
| 217523_at            | CD44        | CD44 antigen (homing function and Indian blood group system)                                    | -1.318             | 3.5615     |
| 221419_s_at          |             |                                                                                                 | -1.318             | 3.5615     |
| 221989_at            | RPL10       | ribosomal protein L10                                                                           | -1.318             | 2.6670     |
| 203476_at            | TPBG        | trophoblast glycoprotein                                                                        | -1.318             | 3.5615     |
| 209411_s_at          | GGA3        | golgi associated, gamma adaptin ear containing, ARF binding protein 3                           | -1.318             | 3.5615     |
| 214880_x_at          | CALD1       | caldesmon 1                                                                                     | -1.318             | 4.2531     |
| 212781_at            | RBBP6       | retinoblastoma binding protein 6                                                                | -1.316             | 0.0000     |
| 216645_at            |             |                                                                                                 | -1.316             | 0.5789     |
| 209668_x_at          | CES2 (CE    | carboxylesterase 2 (intestine, liver)                                                           | -1.316             | 2.6670     |
| 215011_at            | RNU17D      | RNA, U17D small nucleolar                                                                       | -1.314             | 3.5615     |
| 216811_at            |             |                                                                                                 | -1.314             | 1.4789     |
| 213046_at            | PABPN1      | poly(A) binding protein, nuclear 1                                                              | -1.313             | 2.6670     |
| 213729_at            | FNBP3       | formin binding protein 3                                                                        | -1.311             | 0.5789     |
| 215116_s_at          | DNM1        | dynamitin 1                                                                                     | -1.310             | 2.1047     |
| 201446_s_at          | TIA1        | TIA1 cytotoxic granule-associated RNA binding protein                                           | -1.310             | 0.0000     |
| 220148_at            | ALDH8A1     | aldehyde dehydrogenase 8 family, member A1                                                      | -1.308             | 1.4789     |
| 202173_s_at          | ZNF161      | zinc finger protein 161                                                                         | -1.308             | 2.5562     |
| 218463_s_at          | MUS81       | MUS81 endonuclease homolog (yeast)                                                              | -1.306             | 2.1047     |
| 219978_s_at          | NUSAP1      | nucleolar and spindle associated protein 1                                                      | -1.303             | 1.4789     |
| 216983_s_at          | ZNF224      | zinc finger protein 224                                                                         | -1.302             | 2.6670     |
| 201793_x_at          | C1orf16     | chromosome 1 open reading frame 16                                                              | -1.301             | 2.1047     |
| 221789_x_at          | RHOT2       | ras homolog gene family, member T2                                                              | -1.298             | 3.5615     |
| 211968_s_at          | HSPCA       | heat shock 90kDa protein 1, alpha                                                               | -1.298             | 0.5789     |
| 209430_at            | BTAF1       | BTAF1 RNA polymerase II, B-TFIID transcription factor-associated, 170kDa (Mot1 homolog, S. ce   | -1.297             | 2.6670     |
| 211890_x_at          | CAPN3       | calpain 3, (p94)                                                                                | -1.297             | 1.4789     |
| 202033_s_at          | RB1CC1      | RB1-inducible coiled-coil 1                                                                     | -1.297             | 2.1047     |
| 201182_s_at          | CHD4        | chromodomain helicase DNA binding protein 4                                                     | -1.296             | 1.3692     |
| 221829_s_at          | TNPO1       | transportin 1                                                                                   | -1.295             | 4.2531     |
| 208707_at            | EIF5        | eukaryotic translation initiation factor 5                                                      | -1.295             | 1.3692     |
| 212106_at            | ETEA        | expressed in T-cells and eosinophils in atopic dermatitis                                       | -1.295             | 2.6670     |
| 209049_s_at          | PRKCBP1     | protein kinase C binding protein 1                                                              | -1.295             | 4.2531     |
| 202844_s_at          | RALBP1      | ralA binding protein 1                                                                          | -1.294             | 4.2531     |
| 204315_s_at          | GTSE1       | G-2 and S-phase expressed 1                                                                     | -1.294             | 2.1047     |
| 212208_at            | THRAP2      | thyroid hormone receptor associated protein 2                                                   | -1.290             | 3.5615     |
| 204758_s_at          | TMEM24      | transmembrane protein 24                                                                        | -1.289             | 3.5615     |
| 219663_s_at          | MGC4659     | hole gene                                                                                       | -1.289             | 0.5789     |
| 209226_s_at          | TNPO1       | transportin 1                                                                                   | -1.288             | 0.0000     |
| 204970_s_at          | MAFG        | v-maf musculoaponeurotic fibrosarcoma oncogene homolog G (avian)                                | -1.287             | 1.4789     |
| 207637_at            | KIAA0789    | KIAA0789 gene product                                                                           | -1.287             | 2.6670     |
| 212232_at            | FNBP4       | formin binding protein 4                                                                        | -1.287             | 2.6670     |
| AFFX-r2-Ec-bioD-5_at |             |                                                                                                 | -1.286             | 3.5615     |
| 203678_at            | KIAA1018    | KIAA1018 protein                                                                                | -1.286             | 1.3692     |
| 206133_at            | HSXIAPAF    | XIAP associated factor-1                                                                        | -1.285             | 1.4789     |
| 219739_at            | FLJ20225    | ring finger protein 186                                                                         | -1.284             | 0.6984     |
| 203408_s_at          | SATB1       | special AT-rich sequence binding protein 1 (binds to nuclear matrix/scaffold-associating DNA's) | -1.284             | 1.3692     |
| 208325_s_at          | AKAP13      | A kinase (PRKA) anchor protein 13                                                               | -1.283             | 2.6670     |

| <u>Probeset</u>  | <u>Gene</u>  | <u>Annotation</u>                                                                                  | <u>Fold Change</u> | <u>FDR</u>    |
|------------------|--------------|----------------------------------------------------------------------------------------------------|--------------------|---------------|
| 214802_at        | EXOC7        | exocyst complex component 7                                                                        | -1.282             | 3.5615        |
| 203568_s_at      | TRIM38       | tripartite motif-containing 38                                                                     | -1.282             | 4.2531        |
| 201544_x_at      | PABPN1       | poly(A) binding protein, nuclear 1                                                                 | -1.282             | 2.6670        |
| 207198_s_at      | LIMS1        | LIM and senescent cell antigen-like domains 1                                                      | -1.282             | 2.6670        |
| 221986_s_at      | DRE1         | DRE1 protein                                                                                       | -1.281             | 2.6670        |
| 65630_at         | LOC28323     | hypothetical protein LOC283232                                                                     | -1.280             | 3.5615        |
| AFFX-BioDn-5_at  |              |                                                                                                    | -1.280             | 4.2531        |
| 206889_at        | ARHGDIG      | Rho GDP dissociation inhibitor (GDI) gamma                                                         | -1.279             | 0.6984        |
| 220223_at        | FLJ12735     | chromosome 17 open reading frame 41                                                                | -1.277             | 4.2531        |
| 211130_x_at      | EDA          | ectodysplasin A                                                                                    | -1.277             | 4.2531        |
| 207105_s_at      | PIK3R2       | phosphoinositide-3-kinase, regulatory subunit 2 (p85 beta)                                         | -1.277             | 0.6984        |
| 211277_x_at      | APP          | amyloid beta (A4) precursor protein (protease nexin-II, Alzheimer disease)                         | -1.276             | 2.6670        |
| 209889_at        | SEC31L2      | SEC31-like 2 (S. cerevisiae)                                                                       | -1.276             | 4.2531        |
| AFFX-BioB-5_at   |              |                                                                                                    | -1.276             | 4.2531        |
| 220210_at        | CHRNA10      | cholinergic receptor, nicotinic, alpha polypeptide 10                                              | -1.275             | 2.1047        |
| 204398_s_at      | EML2         | echinoderm microtubule associated protein like 2                                                   | -1.275             | 2.5562        |
| 2101010_s_at     | TXNIP        | thioredoxin interacting protein                                                                    | -1.275             | 2.5562        |
| <b>206374_at</b> | <b>DUSP8</b> | <b>dual specificity phosphatase 8</b>                                                              | <b>-1.275</b>      | <b>0.6984</b> |
| 213790_at        | ADAM12       | a disintegrin and metalloproteinase domain 12 (meltrin alpha)                                      | -1.274             | 3.5615        |
| 216051_x_at      | KIAA1217     | KIAA1217                                                                                           | -1.273             | 3.5615        |
| 222337_at        | NRD1         | nardilysin (N-arginine dibasic convertase)                                                         | -1.272             | 2.6670        |
| 205001_s_at      | DDX3Y        | DEAD (Asp-Glu-Ala-Asp) box polypeptide 3, Y-linked                                                 | -1.272             | 1.4789        |
| 209110_s_at      | RGL2         | ral guanine nucleotide dissociation stimulator-like 2                                              | -1.271             | 0.0000        |
| 201711_x_at      | RANBP2       | RAN binding protein 2                                                                              | -1.271             | 3.5615        |
| 201995_at        | EXT1         | exostoses (multiple) 1                                                                             | -1.269             | 4.2531        |
| 217635_s_at      | POLG         | polymerase (DNA directed), gamma                                                                   | -1.269             | 1.4789        |
| 220066_at        | CARD15       | caspase recruitment domain family, member 15                                                       | -1.268             | 3.5615        |
| 200702_s_at      | DDX24        | DEAD (Asp-Glu-Ala-Asp) box polypeptide 24                                                          | -1.268             | 1.3692        |
| 219906_at        | FLJ10213     | hypothetical protein FLJ10213                                                                      | -1.268             | 4.2531        |
| 203155_at        | SETDB1       | SET domain, bifurcated 1                                                                           | -1.267             | 4.2531        |
| 218378_s_at      | PRKRIP1      | PRKR interacting protein 1 (IL11 inducible)                                                        | -1.266             | 2.6670        |
| 208446_s_at      | ZFYVE9       | zinc finger, FYVE domain containing 9                                                              | -1.266             | 2.1047        |
| 213502_x_at      | LOC91316     | similar to bK246H3.1 (immunoglobulin lambda-like polypeptide 1, pre-B-cell specific)               | -1.264             | 2.6670        |
| 211621_at        | AR           | androgen receptor (dihydrotestosterone receptor; testicular feminization; spinal and bulbar muscul | -1.264             | 1.4789        |
| 204221_x_at      | GLIPR1       | GLI pathogenesis-related 1 (glioma)                                                                | -1.264             | 3.5615        |
| 208663_s_at      | TTC3         | tetratricopeptide repeat domain 3                                                                  | -1.263             | 1.3692        |
| 212745_s_at      | BBS4         | Bardet-Biedl syndrome 4                                                                            | -1.263             | 1.3692        |
| 205983_at        | DPEP1        | dipeptidase 1 (renal)                                                                              | -1.262             | 2.6670        |
| 204572_s_at      | PIN4         | protein (peptidyl-prolyl cis/trans isomerase) NIMA-interacting, 4 (parvulin)                       | -1.262             | 3.5615        |
| 203670_at        | TTLL3        | tubulin tyrosine ligase-like family, member 3                                                      | -1.262             | 0.6984        |
| 202305_s_at      | FEZ2         | fasciculation and elongation protein zeta 2 (zygin II)                                             | -1.262             | 2.1047        |
| 201675_at        | AKAP1        | A kinase (PRKA) anchor protein 1                                                                   | -1.262             | 1.3692        |
| 215936_s_at      | KIAA1033     | KIAA1033                                                                                           | -1.261             | 3.5615        |
| 208974_x_at      | KPNB1        | karyopherin (importin) beta 1                                                                      | -1.261             | 1.3692        |
| 214964_at        | TNRC18       | trinucleotide repeat containing 18                                                                 | -1.260             | 2.6670        |
| 209357_at        | CITED2       | Cbp/p300-interacting transactivator, with Glu/Asp-rich carboxy-terminal domain, 2                  | -1.259             | 0.6984        |
| 202155_s_at      | NUP214       | nucleoporin 214kDa                                                                                 | -1.257             | 4.2531        |
| 202182_at        | GCN5L2       | GCN5 general control of amino-acid synthesis 5-like 2 (yeast)                                      | -1.256             | 4.2531        |
| 216641_s_at      | LAD1         | ladinin 1                                                                                          | -1.256             | 2.6670        |
| 204193_at        | CHKB         | choline kinase beta                                                                                | -1.254             | 2.6670        |
| 213910_at        | IGFBP7       | insulin-like growth factor binding protein 7                                                       | -1.254             | 3.5615        |
| 201281_at        | ADRM1        | adhesion regulating molecule 1                                                                     | -1.253             | 4.2531        |
| 203358_s_at      | EZH2         | enhancer of zeste homolog 2 (Drosophila)                                                           | -1.251             | 4.2531        |
| 217832_at        | SYNCRIP      | synaptotagmin binding, cytoplasmic RNA interacting protein                                         | -1.251             | 2.6670        |
| 215640_at        | KIAA1055     | KIAA1055 protein                                                                                   | -1.251             | 1.4789        |
| 203688_at        | PKD2         | polycystic kidney disease 2 (autosomal dominant)                                                   | -1.250             | 1.3692        |
| 203518_at        | LYST         | lysosomal trafficking regulator                                                                    | -1.249             | 2.5562        |
| 217866_at        | FLJ12529     | pre-mRNA cleavage factor I, 59 kDa subunit                                                         | -1.249             | 2.5562        |
| 218402_s_at      | HPS4         | Hermansky-Pudlak syndrome 4                                                                        | -1.247             | 3.5615        |
| 209266_s_at      | SLC39A8      | solute carrier family 39 (zinc transporter), member 8                                              | -1.247             | 3.5615        |
| 206235_at        | LIG4         | ligase IV, DNA, ATP-dependent                                                                      | -1.246             | 3.5615        |
| 221951_at        | LOC28323     | hypothetical protein LOC283232                                                                     | -1.245             | 2.1047        |
| 211097_s_at      | PBX2         | pre-B-cell leukemia transcription factor 2                                                         | -1.245             | 4.2531        |
| 218742_at        | NARFL        | nuclear prelamin A recognition factor-like                                                         | -1.244             | 3.5615        |
| 211670_x_at      | SSX3         | synovial sarcoma, X breakpoint 3                                                                   | -1.243             | 3.5615        |
| 207657_x_at      | TNPO1        | transportin 1                                                                                      | -1.243             | 4.2531        |
| 219228_at        | ZNF331       | zinc finger protein 331                                                                            | -1.242             | 3.5615        |

| <u>Probeset</u> | <u>Gene</u> | <u>Annotation</u>                                                                        | <u>Fold Change</u> | <u>FDR</u> |
|-----------------|-------------|------------------------------------------------------------------------------------------|--------------------|------------|
| 212300_at       | DKFZp451    | taxilin                                                                                  | -1.242             | 4.2531     |
| 221377_s_at     | RBPSUHL     | recombining binding protein suppressor of hairless (Drosophila)-like                     | -1.241             | 4.2531     |
| 203204_s_at     | JMJD2A      | jumonji domain containing 2A                                                             | -1.240             | 0.5789     |
| 216296_at       |             |                                                                                          | -1.240             | 1.4789     |
| 202431_s_at     | MYC         | v-myc myelocytomatosis viral oncogene homolog (avian)                                    | -1.240             | 3.5615     |
| 222339_x_at     |             |                                                                                          | -1.240             | 2.6670     |
| 209669_s_at     | PAI-RBP1    | PAI-1 mRNA binding protein                                                               | -1.238             | 1.4789     |
| 208218_s_at     | ACVR1B      | activin A receptor, type IB                                                              | -1.238             | 3.5615     |
| 211948_x_at     | BAT2D1      | BAT2 domain containing 1                                                                 | -1.238             | 3.5615     |
| 221968_s_at     | LOC51333    | mesenchymal stem cell protein DSC43                                                      | -1.237             | 0.6984     |
| 218929_at       | CARF        | collaborates/cooperates with ARF (alternate reading frame) protein                       | -1.236             | 0.0000     |
| 214055_x_at     | BAT2D1      | BAT2 domain containing 1                                                                 | -1.236             | 4.2531     |
| 208290_s_at     | EIF5        | eukaryotic translation initiation factor 5                                               | -1.234             | 4.2531     |
| 37170_at        | BMP2K       | BMP2 inducible kinase                                                                    | -1.234             | 4.2531     |
| 215076_s_at     | COL3A1      | collagen, type III, alpha 1 (Ehlers-Danlos syndrome type IV, autosomal dominant)         | -1.233             | 2.5562     |
| 214269_at       | FLJ22269    | hypothetical protein FLJ22269                                                            | -1.233             | 2.6670     |
| 205784_x_at     | ARVCF       | armadillo repeat gene deletes in velocardiiofacial syndrome                              | -1.231             | 2.6670     |
| 220639_at       | FLJ22800    | transmembrane 4 L six family member 20                                                   | -1.231             | 2.6670     |
| 208994_s_at     | PPIG        | peptidyl-prolyl isomerase G (cyclophilin G)                                              | -1.230             | 2.5562     |
| 204470_at       | CXCL1       | chemokine (C-X-C motif) ligand 1 (melanoma growth stimulating activity, alpha)           | -1.230             | 1.3692     |
| 208129_x_at     | RUNX1       | runt-related transcription factor 1 (acute myeloid leukemia 1; aml1 oncogene)            | -1.229             | 2.5562     |
| 221187_s_at     | FLJ22688    | hypothetical protein FLJ22688                                                            | -1.228             | 1.3692     |
| 202062_s_at     | SEL1L       | sel-1 suppressor of lin-12-like (C. elegans)                                             | -1.228             | 2.1047     |
| 213852_at       | RBM8A       | RNA binding motif protein 8A                                                             | -1.228             | 2.1047     |
| 209341_s_at     | IKBKB       | inhibitor of kappa light polypeptide gene enhancer in B-cells, kinase beta               | -1.228             | 3.5615     |
| 204182_s_at     | ZNF297B     | zinc finger protein 297B                                                                 | -1.226             | 3.5615     |
| 204558_at       | RAD54L      | RAD54-like (S. cerevisiae)                                                               | -1.226             | 2.1047     |
| 200752_s_at     | CAPN1       | calpain 1, (mu/l) large subunit                                                          | -1.225             | 3.5615     |
| 207428_x_at     | CDC2L1      | cell division cycle 2-like 1 (PITSLRE proteins)                                          | -1.224             | 4.2531     |
| 213367_at       | LOC15506    | hypothetical protein LOC155060                                                           | -1.224             | 1.3692     |
| 212744_at       | BBS4        | Bardet-Biedl syndrome 4                                                                  | -1.224             | 2.6670     |
| 212252_at       | CAMKK2      | calcium/calmodulin-dependent protein kinase kinase 2, beta                               | -1.223             | 3.5615     |
| 217804_s_at     | ILF3        | interleukin enhancer binding factor 3, 90kDa                                             | -1.223             | 2.1047     |
| 214778_at       | EGFL4       | EGF-like-domain, multiple 4                                                              | -1.223             | 2.6670     |
| 212238_at       | ASXL1       | additional sex combs like 1 (Drosophila)                                                 | -1.223             | 2.1047     |
| 209721_s_at     | HOM-TES     | HOM-TES-103 tumor antigen-like                                                           | -1.223             | 2.1047     |
| 206861_s_at     | CGGBP1      | CGG triplet repeat binding protein 1                                                     | -1.222             | 3.5615     |
| 212080_at       | MLL         | myeloid/lymphoid or mixed-lineage leukemia (trithorax homolog, Drosophila)               | -1.222             | 1.3692     |
| 209024_s_at     | SYNCRIP     | synaptotagmin binding, cytoplasmic RNA interacting protein                               | -1.221             | 3.5615     |
| 212561_at       | RAB6IP1     | RAB6 interacting protein 1                                                               | -1.220             | 2.5562     |
| 220974_x_at     | SFXN3       | sideroflexin 3                                                                           | -1.219             | 2.6670     |
| 221797_at       | LOC33922    | hypothetical protein LOC339229                                                           | -1.219             | 4.2531     |
| 210598_at       |             |                                                                                          | -1.219             | 2.1047     |
| 201904_s_at     | CTDSPL      | CTD (carboxy-terminal domain, RNA polymerase II, polypeptide A) small phosphatase-like   | -1.218             | 2.6670     |
| 209370_s_at     | SH3BP2      | SH3-domain binding protein 2                                                             | -1.217             | 2.6670     |
| 200849_s_at     | AHCYL1      | S-adenosylhomocysteine hydrolase-like 1                                                  | -1.216             | 3.5615     |
| 219994_at       | APBB1IP     | amyloid beta (A4) precursor protein-binding, family B, member 1 interacting protein      | -1.216             | 3.5615     |
| 205069_s_at     | ARHGAP2     | Rho GTPase activating protein 26                                                         | -1.216             | 2.6670     |
| 209137_s_at     | USP10       | ubiquitin specific protease 10                                                           | -1.214             | 2.1047     |
| 209190_s_at     | DIAPH1      | diaphanous homolog 1 (Drosophila)                                                        | -1.213             | 2.6670     |
| 204046_at       | PLCB2       | phospholipase C, beta 2                                                                  | -1.213             | 2.5562     |
| 221071_at       |             |                                                                                          | -1.212             | 2.1047     |
| 212505_s_at     | KIAA0892    | KIAA0892                                                                                 | -1.212             | 1.3692     |
| 212818_s_at     | ASB1        | ankyrin repeat and SOCS box-containing 1                                                 | -1.212             | 2.5562     |
| 215275_at       | T3JAM       | TRAF3 interacting protein 3                                                              | -1.211             | 2.6670     |
| 212119_at       | RHOQ        | ras homolog gene family, member Q                                                        | -1.211             | 4.2531     |
| 207671_s_at     | VMD2        | vitelliform macular dystrophy 2 (Best disease, bestrophin)                               | -1.211             | 2.1047     |
| 201331_s_at     | STAT6       | signal transducer and activator of transcription 6, interleukin-4 induced                | -1.209             | 2.5562     |
| 209831_x_at     | DNASE2      | deoxyribonuclease II, lysosomal                                                          | -1.209             | 2.5562     |
| 209920_at       | BMPR2       | bone morphogenetic protein receptor, type II (serine/threonine kinase)                   | -1.208             | 0.6984     |
| 208708_x_at     | EIF5        | eukaryotic translation initiation factor 5                                               | -1.208             | 0.5789     |
| 213043_s_at     | THRAP4      | thyroid hormone receptor associated protein 4                                            | -1.207             | 3.5615     |
| 207514_s_at     | GNAT1       | guanine nucleotide binding protein (G protein), alpha transducing activity polypeptide 1 | -1.207             | 1.3692     |
| 203615_x_at     | SULT1A1     | sulfotransferase family, cytosolic, 1A, phenol-preferring, member 1                      | -1.207             | 1.4789     |
| 212104_s_at     | RBM9        | RNA binding motif protein 9                                                              | -1.206             | 0.5789     |
| 209042_s_at     | UBE2G2      | ubiquitin-conjugating enzyme E2G 2 (UBC7 homolog, yeast)                                 | -1.205             | 3.5615     |
| 202156_s_at     | CUGBP2      | CUG triplet repeat, RNA binding protein 2                                                | -1.204             | 3.5615     |



| <u>Probeset</u> | <u>Gene</u> | <u>Annotation</u>                                                                               | <u>Fold Change</u> | <u>FDR</u> |
|-----------------|-------------|-------------------------------------------------------------------------------------------------|--------------------|------------|
| 219151_s_at     | RABL2A      | RAB, member of RAS oncogene family-like 2A                                                      | -1.203             | 2.5562     |
| 218762_at       | ZNF574      | zinc finger protein 574                                                                         | -1.202             | 1.4789     |
| 203521_s_at     | ZNF318      | zinc finger protein 318                                                                         | -1.202             | 2.5562     |
| 218518_at       | C5orf5      | chromosome 5 open reading frame 5                                                               | -1.202             | 3.5615     |
| 205096_at       | POM121      | POM121 membrane glycoprotein (rat)                                                              | -1.201             | 3.5615     |
| 216741_at       | GLIS1       | GLIS family zinc finger 1                                                                       | -1.201             | 2.1047     |
| 201703_s_at     | PPP1R10     | protein phosphatase 1, regulatory subunit 10                                                    | -1.200             | 3.5615     |
| 214682_at       | LOC33904    | hypothetical protein LOC339047                                                                  | -1.200             | 3.5615     |
| 212534_at       | ZNF24       | zinc finger protein 24 (KOX 17)                                                                 | -1.200             | 2.5562     |
| 202548_s_at     | ARHGEF7     | Rho guanine nucleotide exchange factor (GEF) 7                                                  | -1.200             | 2.6670     |
| 202251_at       | PRPF3       | PRP3 pre-mRNA processing factor 3 homolog (yeast)                                               | -1.199             | 0.5789     |
| 215026_x_at     | SCNN1A      | sodium channel, nonvoltage-gated 1 alpha                                                        | -1.199             | 4.2531     |
| 212258_s_at     | SMARCA2     | SWI/SNF related, matrix associated, actin dependent regulator of chromatin, subfamily a, member | -1.199             | 2.5562     |
| 213971_s_at     | SUZ12       | suppressor of zeste 12 homolog (Drosophila)                                                     | -1.198             | 0.6984     |
| 214786_at       | MAP3K1      | mitogen-activated protein kinase kinase kinase 1                                                | -1.198             | 4.2531     |
| 221818_at       | KIAA1698    | KIAA1698 protein                                                                                | -1.198             | 3.5615     |
| 218248_at       | FLJ22794    | FLJ22794 protein                                                                                | -1.197             | 2.6670     |
| 214418_at       | LOC19699    | hypothetical protein LOC196993                                                                  | -1.197             | 4.2531     |
| 205997_at       | ADAM28      | a disintegrin and metalloproteinase domain 28                                                   | -1.197             | 3.5615     |
| 221484_at       | B4GALT5     | UDP-Gal:betaGlcNAc beta 1,4- galactosyltransferase, polypeptide 5                               | -1.197             | 3.5615     |
| 202626_s_at     | LYN         | v-yes-1 Yamaguchi sarcoma viral related oncogene homolog                                        | -1.197             | 1.3692     |
| 205633_s_at     | ALAS1       | aminolevulinate, delta-, synthase 1                                                             | -1.196             | 2.6670     |
| 207658_s_at     | FOXP1B      | forkhead box G1B                                                                                | -1.196             | 0.6984     |
| 208794_s_at     | SMARCA4     | SWI/SNF related, matrix associated, actin dependent regulator of chromatin, subfamily a, member | -1.196             | 2.5562     |
| 205835_s_at     | YTHDC2      | YTH domain containing 2                                                                         | -1.195             | 4.2531     |
| 221842_s_at     | ZNF131      | zinc finger protein 131 (clone pHZ-10)                                                          | -1.195             | 2.5562     |
| 211627_x_at     | ESR1        | estrogen receptor 1                                                                             | -1.195             | 3.5615     |
| 212019_at       | RSL1D1      | ribosomal L1 domain containing 1                                                                | -1.194             | 2.5562     |
| 213749_at       | MASP1       | mannan-binding lectin serine protease 1 (C4/C2 activating component of Ra-reactive factor)      | -1.194             | 2.5562     |
| 202864_s_at     | SP100       | nuclear antigen Sp100                                                                           | -1.193             | 1.4789     |
| 209688_s_at     | FLJ10996    | hypothetical protein FLJ10996                                                                   | -1.193             | 2.5562     |
| 221430_s_at     | RNF146      | ring finger protein 146                                                                         | -1.192             | 4.2531     |
| 220748_s_at     | ZNF580      | zinc finger protein 580                                                                         | -1.191             | 4.2531     |
| 209004_s_at     | FBXL5       | F-box and leucine-rich repeat protein 5                                                         | -1.191             | 3.5615     |
| 209405_s_at     | FAM3A       | family with sequence similarity 3, member A                                                     | -1.191             | 2.5562     |
| 204544_at       | HPS5        | Hermansky-Pudlak syndrome 5                                                                     | -1.191             | 2.6670     |
| 218376_s_at     | MICAL1      | microtubule associated monooxygenase, calponin and LIM domain containing 1                      | -1.190             | 3.5615     |
| 217396_at       | TUB         | tubby homolog (mouse)                                                                           | -1.188             | 2.5562     |
| 200857_s_at     | NCOR1       | nuclear receptor co-repressor 1                                                                 | -1.187             | 4.2531     |
| 205665_at       | NET-5       | tetraspanin 9                                                                                   | -1.187             | 2.6670     |
| 216289_at       | GPR144      | G protein-coupled receptor 144                                                                  | -1.187             | 4.2531     |
| 205546_s_at     | TYK2        | tyrosine kinase 2                                                                               | -1.185             | 0.5789     |
| 204906_at       | RPS6KA2     | ribosomal protein S6 kinase, 90kDa, polypeptide 2                                               | -1.185             | 3.5615     |
| 220267_at       | KRT24       | keratin 24                                                                                      | -1.185             | 3.5615     |
| 218031_s_at     | CHES1       | checkpoint suppressor 1                                                                         | -1.185             | 3.5615     |
| 208538_at       | ANP32C      | acidic (leucine-rich) nuclear phosphoprotein 32 family, member C                                | -1.185             | 2.6670     |
| 218396_at       | VPS13C      | vacuolar protein sorting 13C (yeast)                                                            | -1.184             | 3.5615     |
| 214946_x_at     | FAM21C      | family with sequence similarity 21, member C                                                    | -1.184             | 2.6670     |
| 218789_s_at     | FLJ20010    | hypothetical protein FLJ20010                                                                   | -1.184             | 4.2531     |
| AFFX-hum_alu    | MACF1       | microtubule-actin crosslinking factor 1                                                         | -1.184             | 1.3692     |
| 221758_at       | ARMC6       | armadillo repeat containing 6                                                                   | -1.182             | 3.5615     |
| 206829_x_at     | ZNF430      | zinc finger protein 430                                                                         | -1.181             | 2.1047     |
| 217535_at       |             |                                                                                                 | -1.181             | 2.1047     |
| 217179_x_at     |             |                                                                                                 | -1.181             | 4.2531     |
| 203750_s_at     | RARA        | retinoic acid receptor, alpha                                                                   | -1.180             | 4.2531     |
| 216691_at       | GRIK5       | glutamate receptor, ionotropic, kainate 5                                                       | -1.180             | 3.5615     |
| 220162_s_at     | CARD9       | caspase recruitment domain family, member 9                                                     | -1.180             | 3.5615     |
| 205068_s_at     | ARHGAP2     | Rho GTPase activating protein 26                                                                | -1.179             | 2.1047     |
| 202328_s_at     | PKD1        | polycystic kidney disease 1 (autosomal dominant)                                                | -1.179             | 0.6984     |
| 203249_at       | EZH1        | enhancer of zeste homolog 1 (Drosophila)                                                        | -1.178             | 1.3692     |
| 209477_at       | EMD         | emerin (Emery-Dreifuss muscular dystrophy)                                                      | -1.177             | 1.3692     |
| 220924_s_at     | SLC38A2     | solute carrier family 38, member 2                                                              | -1.176             | 3.5615     |
| 220316_at       | NPAS3       | neuronal PAS domain protein 3                                                                   | -1.175             | 2.6670     |
| 220349_s_at     | FLJ21865    | endo-beta-N-acetylglucosaminidase                                                               | -1.175             | 3.5615     |
| 212287_at       | SUZ12       | suppressor of zeste 12 homolog (Drosophila)                                                     | -1.173             | 1.3692     |
| 213071_at       | DPT         | dermatopontin                                                                                   | -1.172             | 4.2531     |
| 208853_s_at     | CANX        | calnexin                                                                                        | -1.171             | 2.5562     |

| <u>Probeset</u> | <u>Gene</u> | <u>Annotation</u>                                                                                     | <u>Fold Change</u> | <u>FDR</u> |
|-----------------|-------------|-------------------------------------------------------------------------------------------------------|--------------------|------------|
| 221432_s_at     | SLC25A28    | solute carrier family 25, member 28                                                                   | -1.171             | 2.6670     |
| 202392_s_at     | PISD        | phosphatidylserine decarboxylase                                                                      | -1.171             | 1.3692     |
| 212854_x_at     | DJ328E19    | hypothetical protein DJ328E19.C1.1                                                                    | -1.170             | 3.5615     |
| 207282_s_at     | MYOG        | myogenin (myogenic factor 4)                                                                          | -1.169             | 2.5562     |
| 208595_s_at     | MBD1        | methyl-CpG binding domain protein 1                                                                   | -1.169             | 3.5615     |
| 218829_s_at     | CHD7        | chromodomain helicase DNA binding protein 7                                                           | -1.168             | 3.5615     |
| 219893_at       | FLJ12800    | hypothetical protein FLJ12800                                                                         | -1.167             | 2.6670     |
| 211110_s_at     | AR          | androgen receptor (dihydrotestosterone receptor; testicular feminization; spinal and bulbar muscul    | -1.167             | 4.2531     |
| 219910_at       | HYPE        | Huntingtin interacting protein E                                                                      | -1.167             | 3.5615     |
| 221863_at       | KIAA1193    | KIAA1193                                                                                              | -1.167             | 4.2531     |
| 212370_x_at     | LOC38768    | similar to KIAA0592 protein                                                                           | -1.165             | 1.4789     |
| 208884_s_at     | EDD         | E3 identified by differential display                                                                 | -1.165             | 2.5562     |
| 208485_x_at     | CFLAR       | CASP8 and FADD-like apoptosis regulator                                                               | -1.165             | 0.5789     |
| 212906_at       | KIAA1201    | KIAA1201 protein                                                                                      | -1.164             | 2.6670     |
| 211068_x_at     | FAM21C      | family with sequence similarity 21, member C                                                          | -1.164             | 2.6670     |
| 205049_s_at     | CD79A       | CD79A antigen (immunoglobulin-associated alpha)                                                       | -1.163             | 1.3692     |
| 208385_at       | NR2E3       | nuclear receptor subfamily 2, group E, member 3                                                       | -1.163             | 2.5562     |
| 214817_at       | UNC13A      | unc-13 homolog A (C. elegans)                                                                         | -1.163             | 4.2531     |
| 206876_at       | SIM1        | single-minded homolog 1 (Drosophila)                                                                  | -1.162             | 2.6670     |
| 204442_x_at     | LTBP4       | latent transforming growth factor beta binding protein 4                                              | -1.162             | 2.6670     |
| 214534_at       | HIST1H1B    | histone 1, H1b                                                                                        | -1.161             | 4.2531     |
| 206459_s_at     | WNT2B       | wingless-type MMTV integration site family, member 2B                                                 | -1.161             | 3.5615     |
| 202283_at       | SERPINF1    | serine (or cysteine) proteinase inhibitor, clade F (alpha-2 antiplasmin, pigment epithelium derived i | -1.161             | 3.5615     |
| 216331_at       | ITGA7       | integrin, alpha 7                                                                                     | -1.160             | 0.5789     |
| 203794_at       | CDC42BP     | CDC42 binding protein kinase alpha (DMPK-like)                                                        | -1.159             | 4.2531     |
| 221655_x_at     | EPS8L1      | EPS8-like 1                                                                                           | -1.158             | 4.2531     |
| 204817_at       | ESPL1       | extra spindle poles like 1 (S. cerevisiae)                                                            | -1.158             | 0.5789     |
| 201152_s_at     | MBNL1       | muscleblind-like (Drosophila)                                                                         | -1.157             | 3.5615     |
| 209561_at       | THBS3       | thrombospondin 3                                                                                      | -1.157             | 1.4789     |
| 216204_at       | ARVCF       | armadillo repeat gene deletes in velocardiofacial syndrome                                            | -1.157             | 4.2531     |
| 201386_s_at     | DHX15       | DEAH (Asp-Glu-Ala-His) box polypeptide 15                                                             | -1.156             | 4.2531     |
| 205117_at       | FGF1        | fibroblast growth factor 1 (acidic)                                                                   | -1.156             | 3.5615     |
| 221679_s_at     | ABHD6       | abhydrolase domain containing 6                                                                       | -1.154             | 4.2531     |
| 219698_s_at     | METTL4      | methyltransferase like 4                                                                              | -1.153             | 1.4789     |
| 209910_at       | SLC25A16    | solute carrier family 25 (mitochondrial carrier; Graves disease autoantigen), member 16               | -1.153             | 1.3692     |
| 207581_s_at     | MAGEB4      | melanoma antigen family B, 4                                                                          | -1.152             | 2.6670     |
| 201071_x_at     | SF3B1       | splicing factor 3b, subunit 1, 155kDa                                                                 | -1.151             | 3.5615     |
| 201591_s_at     | NISCH       | nischarin                                                                                             | -1.150             | 2.1047     |
| 217199_s_at     | STAT2       | signal transducer and activator of transcription 2, 113kDa                                            | -1.149             | 2.1047     |
| 215777_at       |             |                                                                                                       | -1.148             | 4.2531     |
| 218907_s_at     | MGC3036     | hypothetical protein MGC3036                                                                          | -1.148             | 3.5615     |
| 201104_x_at     |             |                                                                                                       | -1.148             | 1.3692     |
| 44040_at        | FBXO41      | F-box protein 41                                                                                      | -1.147             | 2.6670     |
| 211421_s_at     | RET         | ret proto-oncogene (multiple endocrine neoplasia and medullary thyroid carcinoma 1, Hirschsprun       | -1.147             | 4.2531     |
| 202550_s_at     | VAPB        | VAMP (vesicle-associated membrane protein)-associated protein B and C                                 | -1.147             | 2.5562     |
| 209689_at       | FLJ10996    | hypothetical protein FLJ10996                                                                         | -1.146             | 3.5615     |
| 45687_at        | MGC3121     | hypothetical protein MGC3121                                                                          | -1.145             | 2.5562     |
| 218991_at       | ABC1        | amplified in breast cancer 1                                                                          | -1.145             | 4.2531     |
| 204878_s_at     | TAOK2       | TAO kinase 2                                                                                          | -1.144             | 2.6670     |
| 201086_x_at     | SON         | SON DNA binding protein                                                                               | -1.143             | 0.6984     |
| 216882_s_at     | NEBL        | nebulette                                                                                             | -1.142             | 4.2531     |
| 206095_s_at     | FUSIP1      | FUS interacting protein (serine-arginine rich) 1                                                      | -1.142             | 2.6670     |
| 207634_at       | PDCD1       | programmed cell death 1                                                                               | -1.140             | 4.2531     |
| 201612_at       | ALDH9A1     | aldehyde dehydrogenase 9 family, member A1                                                            | -1.140             | 4.2531     |
| 214670_at       | ZKSCAN1     | zinc finger with KRAB and SCAN domains 1                                                              | -1.140             | 2.6670     |
| 210266_s_at     | TRIM33      | tripartite motif-containing 33                                                                        | -1.139             | 2.6670     |
| 204709_s_at     | KIF23       | kinesin family member 23                                                                              | -1.137             | 4.2531     |
| 212457_at       | TFE3        | transcription factor binding to IGHE enhancer 3                                                       | -1.137             | 1.3692     |
| 206773_at       | LY6H        | lymphocyte antigen 6 complex, locus H                                                                 | -1.136             | 2.6670     |
| 221135_s_at     | HT001       | HT001 protein                                                                                         | -1.136             | 2.6670     |
| 217138_x_at     |             |                                                                                                       | -1.133             | 4.2531     |
| 219413_at       | ACBD4       | acyl-Coenzyme A binding domain containing 4                                                           | -1.132             | 2.1047     |
| 202598_at       | S100A13     | S100 calcium binding protein A13                                                                      | -1.132             | 4.2531     |
| 221815_at       | ABHD2       | abhydrolase domain containing 2                                                                       | -1.132             | 2.6670     |
| 209584_x_at     | APOBEC3     | apolipoprotein B mRNA editing enzyme, catalytic polypeptide-like 3C                                   | -1.129             | 4.2531     |
| 204277_s_at     | TK2         | thymidine kinase 2, mitochondrial                                                                     | -1.129             | 1.3692     |
| 220976_s_at     | KRTAP1-1    | keratin associated protein 1-1                                                                        | -1.127             | 2.5562     |

| <u>Probeset</u> | <u>Gene</u> | <u>Annotation</u>                                                                       | <u>Fold Change</u> | <u>FDR</u> |
|-----------------|-------------|-----------------------------------------------------------------------------------------|--------------------|------------|
| 205180_s_at     | ADAM8       | a disintegrin and metalloproteinase domain 8                                            | -1.126             | 2.6670     |
| 220284_at       | DKKL1       | dickkopf-like 1 (soggy)                                                                 | -1.125             | 4.2531     |
| 214349_at       |             |                                                                                         | -1.123             | 4.2531     |
| 207353_s_at     | HMX1        | homeo box (H6 family) 1                                                                 | -1.121             | 2.5562     |
| 205641_s_at     | TRADD       | TNFRSF1A-associated via death domain                                                    | -1.119             | 3.5615     |
| 203871_at       | SEN3        | SUMO1/sentrin/SMT3 specific protease 3                                                  | -1.119             | 4.2531     |
| 203364_s_at     | KIAA0652    | KIAA0652 gene product                                                                   | -1.118             | 2.6670     |
| 212124_at       | RAI17       | retinoic acid induced 17                                                                | -1.117             | 4.2531     |
| 208640_at       | RAC1        | ras-related C3 botulinum toxin substrate 1 (rho family, small GTP binding protein Rac1) | -1.116             | 2.1047     |
| 35254_at        | FLN29       | TRAF-type zinc finger domain containing 1                                               | -1.111             | 1.3692     |
| 204788_s_at     | PPOX        | protoporphyrinogen oxidase                                                              | -1.111             | 2.5562     |
| 202108_at       | PEPD        | peptidase D                                                                             | -1.110             | 4.2531     |
| 220417_s_at     | THAP4       | THAP domain containing 4                                                                | -1.110             | 2.1047     |
| 203927_at       | NFKBIE      | nuclear factor of kappa light polypeptide gene enhancer in B-cells inhibitor, epsilon   | -1.109             | 3.5615     |
| 213779_at       | EMID1       | EMI domain containing 1                                                                 | -1.108             | 2.5562     |
| 221580_s_at     | MGC5306     | hypothetical protein MGC5306                                                            | -1.108             | 4.2531     |
| 210835_s_at     | CTBP2       | C-terminal binding protein 2                                                            | -1.107             | 2.5562     |
| 216384_x_at     |             |                                                                                         | -1.101             | 2.6670     |
| 204377_s_at     | VprBP       | Vpr-binding protein                                                                     | -1.100             | 3.5615     |
| 213590_at       | SLC16A5     | solute carrier family 16 (monocarboxylic acid transporters), member 5                   | -1.100             | 2.6670     |
| 212455_at       | YT521       | splicing factor YT521-B                                                                 | -1.096             | 4.2531     |
| 209435_s_at     | ARHGEF2     | rho/rac guanine nucleotide exchange factor (GEF) 2                                      | -1.095             | 2.6670     |
| 221013_s_at     | APOL2       | apolipoprotein L, 2                                                                     | -1.095             | 2.6670     |
| 213507_s_at     | KPNB1       | karyopherin (importin) beta 1                                                           | -1.094             | 2.5562     |
| 220965_s_at     | RSHL1       | radial spokehead-like 1                                                                 | -1.093             | 3.5615     |
| 218423_x_at     | VPS54       | vacuolar protein sorting 54 (yeast)                                                     | -1.092             | 3.5615     |
| 35685_at        | RING1       | ring finger protein 1                                                                   | -1.085             | 2.5562     |
| 214812_s_at     | MOBK1B      | MOB1, Mps One Binder kinase activator-like 1B (yeast)                                   | -1.085             | 1.4789     |
| 204924_at       | TLR2        | toll-like receptor 2                                                                    | -1.084             | 2.6670     |
| 201832_s_at     | VDP         | vesicle docking protein p115                                                            | -1.082             | 1.3692     |
| 211921_x_at     | PTMA        | prothymosin, alpha (gene sequence 28)                                                   | -1.066             | 2.5562     |
| 222250_s_at     | DKFZP434    | chromosome 1 open reading frame 73                                                      | -1.065             | 2.6670     |
| 200002_at       | RPL35       | ribosomal protein L35                                                                   | -1.064             | 4.2531     |
| 210120_s_at     | RANBP3      | RAN binding protein 3                                                                   | -1.050             | 3.5615     |
| 213377_x_at     | RPS12       | ribosomal protein S12                                                                   | 1.049              | 2.6670     |
| 213588_x_at     | RPL14       | ribosomal protein L14                                                                   | 1.066              | 2.5562     |
| 213846_at       | COX7C       | cytochrome c oxidase subunit VIIc                                                       | 1.068              | 2.5562     |
| 213828_x_at     | H3F3A       | H3 histone, family 3A                                                                   | 1.071              | 2.6670     |
| 200807_s_at     | HSPD1       | heat shock 60kDa protein 1 (chaperonin)                                                 | 1.076              | 2.1047     |
| 203947_at       | CSTF3       | cleavage stimulation factor, 3' pre-RNA, subunit 3, 77kDa                               | 1.078              | 3.5615     |
| 219209_at       | IFIH1       | interferon induced with helicase C domain 1                                             | 1.078              | 1.2983     |
| 202426_s_at     | RXRA        | retinoid X receptor, alpha                                                              | 1.079              | 2.1047     |
| 220989_s_at     | AMN         | amniotless homolog (mouse)                                                              | 1.081              | 2.5562     |
| 564_at          | GNA11       | guanine nucleotide binding protein (G protein), alpha 11 (Gq class)                     | 1.083              | 3.5615     |
| 212479_s_at     | FLJ13910    | hypothetical protein FLJ13910                                                           | 1.085              | 2.5562     |
| 211628_x_at     |             |                                                                                         | 1.087              | 1.4789     |
| 213347_x_at     | RPS4X       | ribosomal protein S4, X-linked                                                          | 1.089              | 2.5562     |
| 208351_s_at     | MAPK1       | mitogen-activated protein kinase 1                                                      | 1.092              | 4.2531     |
| 200682_s_at     | UBE2L3      | ubiquitin-conjugating enzyme E2L 3                                                      | 1.093              | 4.2531     |
| 202168_at       | TAF9        | TAF9 RNA polymerase II, TATA box binding protein (TBP)-associated factor, 32kDa         | 1.093              | 2.1047     |
| 205760_s_at     | OGG1        | 8-oxoguanine DNA glycosylase                                                            | 1.094              | 2.6670     |
| 221492_s_at     | APG3L       | APG3 autophagy 3-like (S. cerevisiae)                                                   | 1.101              | 4.2531     |
| 205149_s_at     | CLCN4       | chloride channel 4                                                                      | 1.102              | 2.6670     |
| 204281_at       | TEAD4       | TEA domain family member 4                                                              | 1.103              | 1.4789     |
| 205480_s_at     | UGP2        | UDP-glucose pyrophosphorylase 2                                                         | 1.104              | 1.2983     |
| 206263_at       | FMO4        | flavin containing monooxygenase 4                                                       | 1.105              | 3.5615     |
| 217839_at       | TFG         | TRK-fused gene                                                                          | 1.106              | 4.2531     |
| 200980_s_at     | PDHA1       | pyruvate dehydrogenase (lipoamide) alpha 1                                              | 1.107              | 3.5615     |
| 209272_at       | NAB1        | NGFI-A binding protein 1 (EGR1 binding protein 1)                                       | 1.110              | 4.2531     |
| 202749_at       | WRB         | tryptophan rich basic protein                                                           | 1.111              | 3.5615     |
| 208680_at       | PRDX1       | peroxiredoxin 1                                                                         | 1.112              | 4.2531     |
| 213489_at       | MAPRE2      | microtubule-associated protein, RP/EB family, member 2                                  | 1.114              | 2.1047     |
| 201931_at       | ETFA        | electron-transfer-flavoprotein, alpha polypeptide (glutaric aciduria II)                | 1.117              | 2.1047     |
| 200670_at       | XBP1        | X-box binding protein 1                                                                 | 1.117              | 2.5562     |
| 202541_at       | SCYE1       | small inducible cytokine subfamily E, member 1 (endothelial monocyte-activating)        | 1.117              | 3.5615     |
| 33304_at        | ISG20       | interferon stimulated exonuclease gene 20kDa                                            | 1.118              | 2.1047     |
| 202494_at       | PPIE        | peptidylprolyl isomerase E (cyclophilin E)                                              | 1.119              | 3.5615     |

| <u>Probeset</u> | <u>Gene</u> | <u>Annotation</u>                                                                         | <u>Fold Change</u> | <u>FDR</u> |
|-----------------|-------------|-------------------------------------------------------------------------------------------|--------------------|------------|
| 209374_s_at     | IGHM        | immunoglobulin heavy constant mu                                                          | 1.120              | 2.5562     |
| 202801_at       | PRKACA      | protein kinase, cAMP-dependent, catalytic, alpha                                          | 1.120              | 2.6670     |
| 213149_at       | DLAT        | dihydrolipoamide S-acetyltransferase (E2 component of pyruvate dehydrogenase complex)     | 1.122              | 2.1047     |
| 203138_at       | HAT1        | histone acetyltransferase 1                                                               | 1.123              | 3.5615     |
| 202001_s_at     | NDUFA6      | NADH dehydrogenase (ubiquinone) 1 alpha subcomplex, 6, 14kDa                              | 1.124              | 2.5562     |
| 202390_s_at     | Hd (Huntin  | huntingtin (Huntington disease)                                                           | 1.124              | 2.1047     |
| 215398_at       | HRPT2       | hyperparathyroidism 2 (with jaw tumor)                                                    | 1.125              | 3.5615     |
| 219385_at       | SLAMF8      | SLAM family member 8                                                                      | 1.126              | 3.5615     |
| 208943_s_at     | TLOC1       | translocation protein 1                                                                   | 1.127              | 2.6670     |
| 217980_s_at     | MRPL16      | mitochondrial ribosomal protein L16                                                       | 1.127              | 2.5562     |
| 217932_at       | MRPS7       | mitochondrial ribosomal protein S7                                                        | 1.128              | 1.2983     |
| 205381_at       | LRRIC17     | leucine rich repeat containing 17                                                         | 1.128              | 2.6670     |
| 209128_s_at     | SART3       | squamous cell carcinoma antigen recognised by T cells 3                                   | 1.128              | 3.5615     |
| 218145_at       | TRIB3       | tribbles homolog 3 (Drosophila)                                                           | 1.129              | 1.4789     |
| 205379_at       | CBR3        | carbonyl reductase 3                                                                      | 1.129              | 0.4049     |
| 204532_x_at     | UGT1A9      | UDP glycosyltransferase 1 family, polypeptide A9                                          | 1.130              | 2.6670     |
| 209157_at       | DNAJA2      | DnaJ (Hsp40) homolog, subfamily A, member 2                                               | 1.130              | 3.5615     |
| 219148_at       | PBK         | PDZ binding kinase                                                                        | 1.133              | 4.2531     |
| 219784_at       | FBXO31      | F-box protein 31                                                                          | 1.133              | 1.2983     |
| 203764_at       | DLG7        | discs, large homolog 7 (Drosophila)                                                       | 1.134              | 0.6984     |
| 202297_s_at     | RER1        | RER1 retention in endoplasmic reticulum 1 homolog (S. cerevisiae)                         | 1.136              | 3.5615     |
| 217711_at       |             |                                                                                           | 1.137              | 3.5615     |
| 33768_at        | DMWD        | dystrophia myotonica-containing WD repeat motif                                           | 1.137              | 2.5562     |
| 213854_at       | SYNGR1      | synaptogyrin 1                                                                            | 1.137              | 2.5562     |
| 220344_at       | C11orf16    | chromosome 11 open reading frame 16                                                       | 1.137              | 3.5615     |
| 213760_s_at     | ZNF330      | zinc finger protein 330                                                                   | 1.138              | 4.2531     |
| 219212_at       | HSPA14      | heat shock 70kDa protein 14                                                               | 1.138              | 3.5615     |
| 216103_at       | THEA        | thioesterase, adipose associated                                                          | 1.138              | 2.6670     |
| 203960_s_at     | C1orf41     | chromosome 1 open reading frame 41                                                        | 1.138              | 1.2983     |
| 203166_at       | CFDP1       | craniofacial development protein 1                                                        | 1.141              | 2.6670     |
| 206768_at       | RPL3L       | ribosomal protein L3-like                                                                 | 1.143              | 3.5615     |
| 222117_s_at     | ADCK2       | aarF domain containing kinase 2                                                           | 1.143              | 3.5615     |
| 209507_at       | RPA3        | replication protein A3, 14kDa                                                             | 1.144              | 2.5562     |
| 213535_s_at     | UBE2I       | ubiquitin-conjugating enzyme E2I (UBC9 homolog, yeast)                                    | 1.145              | 3.5615     |
| 202529_at       | PRPSAP1     | phosphoribosyl pyrophosphate synthetase-associated protein 1                              | 1.145              | 2.6670     |
| 208349_at       | TRPA1       | transient receptor potential cation channel, subfamily A, member 1                        | 1.145              | 3.5615     |
| 201835_s_at     | PRKAB1      | protein kinase, AMP-activated, beta 1 non-catalytic subunit                               | 1.146              | 1.4789     |
| 1053_at         | RFC2        | replication factor C (activator 1) 2, 40kDa                                               | 1.146              | 3.5615     |
| 200673_at       | LAPTM4A     | lysosomal-associated protein transmembrane 4 alpha                                        | 1.146              | 0.4049     |
| 215050_x_at     | MAPKAPK     | mitogen-activated protein kinase-activated protein kinase 2                               | 1.147              | 2.1047     |
| 208777_s_at     | PSMD11      | proteasome (prosome, macropain) 26S subunit, non-ATPase, 11                               | 1.147              | 3.5615     |
| 203858_s_at     | COX10       | COX10 homolog, cytochrome c oxidase assembly protein, heme A: farnesyltransferase (yeast) | 1.149              | 2.6670     |
| 216126_at       | MGC3982     | hypothetical protein MGC39821                                                             | 1.149              | 4.2531     |
| 220618_s_at     | ZCWPW1      | zinc finger, CW type with PWWP domain 1                                                   | 1.149              | 3.5615     |
| 221357_at       | CHRM4       | cholinergic receptor, muscarinic 4                                                        | 1.150              | 2.1047     |
| 215998_at       | SDK1        | sidekick homolog 1 (chicken)                                                              | 1.150              | 1.2983     |
| 203315_at       | NCK2        | NCK adaptor protein 2                                                                     | 1.150              | 1.2983     |
| 204575_s_at     | MMP19       | matrix metalloproteinase 19                                                               | 1.151              | 3.5615     |
| 221726_at       | RPL22       | ribosomal protein L22                                                                     | 1.151              | 0.0000     |
| 215451_s_at     | MLLT2       | AF4/FMR2 family, member 1                                                                 | 1.154              | 4.2531     |
| 212787_at       | YLPM1       | YLP motif containing 1                                                                    | 1.155              | 2.6670     |
| 204948_s_at     | FST         | folistatin                                                                                | 1.158              | 0.4049     |
| 209849_s_at     | RAD51C      | RAD51 homolog C (S. cerevisiae)                                                           | 1.158              | 2.5562     |
| 44120_at        | ADCK2       | aarF domain containing kinase 2                                                           | 1.159              | 4.2531     |
| 217619_x_at     |             |                                                                                           | 1.160              | 2.5562     |
| AFFX-LysX-M_at  |             |                                                                                           | 1.161              | 4.2531     |
| 201764_at       | MGC5576     | hypothetical protein MGC5576                                                              | 1.161              | 2.6670     |
| 200880_at       | DNAJA1      | DnaJ (Hsp40) homolog, subfamily A, member 1                                               | 1.161              | 2.5562     |
| 218177_at       | CHMP1.5     | chromatin modifying protein 1B                                                            | 1.161              | 2.5562     |
| 32094_at        | CHST3       | carbohydrate (chondroitin 6) sulfotransferase 3                                           | 1.161              | 2.6670     |
| 212339_at       | EPB41L1     | erythrocyte membrane protein band 4.1-like 1                                              | 1.162              | 4.2531     |
| 220070_at       | FLJ13798    | hypothetical protein FLJ13798                                                             | 1.164              | 2.6670     |
| 212341_at       | MGC2141     | hypothetical protein MGC21416                                                             | 1.165              | 3.5615     |
| 217818_s_at     | ARPC4       | actin related protein 2/3 complex, subunit 4, 20kDa                                       | 1.165              | 2.6670     |
| 221511_x_at     | CCPG1       | cell cycle progression 1                                                                  | 1.165              | 2.5562     |
| 212374_at       | FEM1B       | fem-1 homolog b (C. elegans)                                                              | 1.165              | 1.4789     |
| 206043_s_at     | KIAA0703    | KIAA0703 gene product                                                                     | 1.167              | 4.2531     |

| <b>Probeset</b> | <b>Gene</b> | <b>Annotation</b>                                                                                | <b>Fold Change</b> | <b>FDR</b> |
|-----------------|-------------|--------------------------------------------------------------------------------------------------|--------------------|------------|
| 214210_at       | SLC25A17    | solute carrier family 25 (mitochondrial carrier; peroxisomal membrane protein, 34kDa), member 17 | 1.169              | 2.5562     |
| 215772_x_at     | SUCLG2      | succinate-CoA ligase, GDP-forming, beta subunit                                                  | 1.169              | 2.6670     |
| 201457_x_at     | BUB3        | BUB3 budding uninhibited by benzimidazoles 3 homolog (yeast)                                     | 1.171              | 1.2983     |
| 202647_s_at     | NRAS        | neuroblastoma RAS viral (v-ras) oncogene homolog                                                 | 1.172              | 3.5615     |
| 208357_x_at     | CSH1        | chorionic somatomammotropin hormone 1 (placental lactogen)                                       | 1.172              | 3.5615     |
| 220496_at       | CLEC1B      | C-type lectin domain family 1, member B                                                          | 1.175              | 2.1047     |
| 221707_s_at     | FLJ10979    | hypothetical protein FLJ10979                                                                    | 1.175              | 1.2983     |
| 216223_at       | CPN2        | carboxypeptidase N, polypeptide 2, 83kD                                                          | 1.175              | 3.5615     |
| 206524_at       | T           | T, brachyury homolog (mouse)                                                                     | 1.175              | 4.2531     |
| 221517_s_at     | CRSP6       | cofactor required for Sp1 transcriptional activation, subunit 6, 77kDa                           | 1.176              | 2.6670     |
| 217904_s_at     | BACE1       | beta-site APP-cleaving enzyme 1                                                                  | 1.176              | 2.5562     |
| 201380_at       | CRTAP       | cartilage associated protein                                                                     | 1.176              | 2.6670     |
| 204745_x_at     | MT1G        | metallothionein 1G                                                                               | 1.177              | 3.5615     |
| 218918_at       | MAN1C1      | mannosidase, alpha, class 1C, member 1                                                           | 1.178              | 0.6984     |
| 217834_s_at     | SYNCRIP     | synaptotagmin binding, cytoplasmic RNA interacting protein                                       | 1.180              | 2.1047     |
| 201739_at       | SGK         | serum/glucocorticoid regulated kinase                                                            | 1.183              | 3.5615     |
| 210946_at       | PPAP2A      | phosphatidic acid phosphatase type 2A                                                            | 1.183              | 1.2983     |
| 210002_at       | GATA6       | GATA binding protein 6                                                                           | 1.183              | 3.5615     |
| 212658_at       | LHFPL2      | lipoma HMGIC fusion partner-like 2                                                               | 1.185              | 0.0000     |
| 212659_s_at     | IL1RN       | interleukin 1 receptor antagonist                                                                | 1.187              | 3.5615     |
| 39249_at        | AQP3        | aquaporin 3                                                                                      | 1.188              | 2.5562     |
| 221896_s_at     | HIG1        | likely ortholog of mouse hypoxia induced gene 1                                                  | 1.190              | 2.5562     |
| 212769_at       | TLE3        | transducin-like enhancer of split 3 (E(sp1) homolog, Drosophila)                                 | 1.190              | 2.1047     |
| 210164_at       | GZMB        | granzyme B (granzyme 2, cytotoxic T-lymphocyte-associated serine esterase 1)                     | 1.192              | 3.5615     |
| 217843_s_at     | MED4        | mediator of RNA polymerase II transcription, subunit 4 homolog (yeast)                           | 1.193              | 3.5615     |
| 220961_s_at     | TBRG4       | transforming growth factor beta regulator 4                                                      | 1.193              | 3.5615     |
| 219467_at       | FLJ20125    | hypothetical protein FLJ20125                                                                    | 1.194              | 0.4049     |
| 219613_s_at     | SIRT6       | sirtuin (silent mating type information regulation 2 homolog) 6 (S. cerevisiae)                  | 1.195              | 2.1047     |
| 206945_at       | LCT         | lactase                                                                                          | 1.195              | 1.4789     |
| 47571_at        | ZNF236      | zinc finger protein 236                                                                          | 1.195              | 1.2983     |
| 208581_x_at     | MT1X        | metallothionein 1X                                                                               | 1.196              | 2.5562     |
| 218756_s_at     | MGC4172     | short-chain dehydrogenase/reductase                                                              | 1.198              | 2.6670     |
| 211809_x_at     | COL13A1     | collagen, type XIII, alpha 1                                                                     | 1.199              | 3.5615     |
| 36829_at        | PER1        | period homolog 1 (Drosophila)                                                                    | 1.200              | 0.4049     |
| 219686_at       | STK32B      | serine/threonine kinase 32B                                                                      | 1.200              | 3.5615     |
| 205120_s_at     | SGCB        | sarcoglycan, beta (43kDa dystrophin-associated glycoprotein)                                     | 1.200              | 4.2531     |
| 209906_at       | C3AR1       | complement component 3a receptor 1                                                               | 1.201              | 3.5615     |
| AFFX-ThrX-M_at  |             |                                                                                                  | 1.201              | 2.5562     |
| 214108_at       | MAX         | MYC associated factor X                                                                          | 1.201              | 1.4789     |
| 212268_at       | SERPINB1    | serine (or cysteine) proteinase inhibitor, clade B (ovalbumin), member 1                         | 1.202              | 0.0000     |
| 205037_at       | RABL4       | RAB, member of RAS oncogene family-like 4                                                        | 1.202              | 2.5562     |
| 200730_s_at     | PTP4A1      | protein tyrosine phosphatase type IVA, member 1                                                  | 1.202              | 2.6670     |
| 203455_s_at     | SAT         | spermidine/spermine N1-acetyltransferase                                                         | 1.202              | 2.5562     |
| 203406_at       | MFAP1       | microfibrillar-associated protein 1                                                              | 1.203              | 4.2531     |
| 213217_at       | ADCY2       | adenylate cyclase 2 (brain)                                                                      | 1.203              | 3.5615     |
| 218852_at       | C14orf10    | chromosome 14 open reading frame 10                                                              | 1.203              | 1.2983     |
| 211676_s_at     | IFNGR1      | interferon gamma receptor 1                                                                      | 1.204              | 2.5562     |
| 205426_s_at     | HIP1        | huntingtin interacting protein 1                                                                 | 1.205              | 4.2531     |
| 205744_at       | DOC2A       | double C2-like domains, alpha                                                                    | 1.205              | 2.1047     |
| 201388_at       | PSMD3       | proteasome (prosome, macropain) 26S subunit, non-ATPase, 3                                       | 1.206              | 2.5562     |
| 209739_s_at     | PNPLA4      | patatin-like phospholipase domain containing 4                                                   | 1.207              | 1.4789     |
| 209184_s_at     | IRS2        | insulin receptor substrate 2                                                                     | 1.207              | 3.5615     |
| 210895_s_at     | CD86        | CD86 antigen (CD28 antigen ligand 2, B7-2 antigen)                                               | 1.208              | 3.5615     |
| 215207_x_at     |             |                                                                                                  | 1.208              | 3.5615     |
| 203813_s_at     | SLIT3       | slit homolog 3 (Drosophila)                                                                      | 1.209              | 3.5615     |
| 220571_at       | PRDM11      | PR domain containing 11                                                                          | 1.209              | 2.6670     |
| 205492_s_at     | DPYSL4      | dihydropyrimidinase-like 4                                                                       | 1.209              | 3.5615     |
| 218510_x_at     | FLJ20152    | hypothetical protein FLJ20152                                                                    | 1.209              | 2.6670     |
| 220094_s_at     | C6orf79     | chromosome 6 open reading frame 79                                                               | 1.210              | 1.4789     |
| 203436_at       | RPP30       | ribonuclease P/MRP 30kDa subunit                                                                 | 1.211              | 1.2983     |
| 201925_s_at     | DAF         | decay accelerating factor for complement (CD55, Cromer blood group system)                       | 1.212              | 2.1047     |
| 213467_at       |             |                                                                                                  | 1.212              | 2.5562     |
| 201366_at       | ANXA7       | annexin A7                                                                                       | 1.212              | 2.1047     |
| 206421_s_at     | SERPINB7    | serine (or cysteine) proteinase inhibitor, clade B (ovalbumin), member 7                         | 1.215              | 3.5615     |
| 205591_at       | OLFM1       | olfactomedin 1                                                                                   | 1.215              | 4.2531     |
| 206510_at       | SIX2        | sine oculis homeobox homolog 2 (Drosophila)                                                      | 1.216              | 2.6670     |
| 220815_at       | CTNNA3      | catenin (cadherin-associated protein), alpha 3                                                   | 1.217              | 2.1047     |

| <u>Probeset</u> | <u>Gene</u> | <u>Annotation</u>                                                                | <u>Fold Change</u> | <u>FDR</u> |
|-----------------|-------------|----------------------------------------------------------------------------------|--------------------|------------|
| 203256_at       | CDH3        | cadherin 3, type 1, P-cadherin (placental)                                       | 1.217              | 4.2531     |
| 33579_i_at      | GALR3       | galanin receptor 3                                                               | 1.218              | 3.5615     |
| 217165_x_at     | MT1F        | metallothionein 1F (functional)                                                  | 1.218              | 0.4049     |
| 209053_s_at     | WHSC1       | Wolf-Hirschhorn syndrome candidate 1                                             | 1.218              | 2.5562     |
| 202252_at       | RAB13       | RAB13, member RAS oncogene family                                                | 1.219              | 1.2983     |
| 216023_at       | JMJD2B      | jumonji domain containing 2B                                                     | 1.219              | 0.4049     |
| 206461_x_at     | MT1H        | metallothionein 1H                                                               | 1.220              | 2.5562     |
| 213224_s_at     | LOC92482    | hypothetical protein LOC92482                                                    | 1.220              | 3.5615     |
| 216763_at       |             |                                                                                  | 1.220              | 2.6670     |
| 396_f_at        | EPOR        | erythropoietin receptor                                                          | 1.221              | 1.4789     |
| 200988_s_at     | PSME3       | proteasome (prosome, macropain) activator subunit 3 (PA28 gamma; Ki)             | 1.222              | 3.5615     |
| 211456_x_at     |             |                                                                                  | 1.222              | 1.2983     |
| 218904_s_at     | C9orf40     | chromosome 9 open reading frame 40                                               | 1.222              | 2.6670     |
| 210321_at       | GZMH        | granzyme H (cathepsin G-like 2, protein h-CCPX)                                  | 1.223              | 1.2983     |
| 201303_at       | DDX48       | DEAD (Asp-Glu-Ala-Asp) box polypeptide 48                                        | 1.224              | 1.2983     |
| 91682_at        |             |                                                                                  | 1.225              | 2.5562     |
| 213739_at       |             |                                                                                  | 1.225              | 1.2983     |
| 207075_at       | CIAS1       | cold autoinflammatory syndrome 1                                                 | 1.225              | 1.4789     |
| 201838_s_at     | STAF65(g    | suppressor of Ty 7 (S. cerevisiae)-like                                          | 1.225              | 3.5615     |
| 219855_at       | NUDT11      | nudix (nucleoside diphosphate linked moiety X)-type motif 11                     | 1.226              | 0.4049     |
| 219667_s_at     | BANK1       | B-cell scaffold protein with ankyrin repeats 1                                   | 1.226              | 2.5562     |
| 219161_s_at     | CKLF        | chemokine-like factor                                                            | 1.227              | 4.2531     |
| 216078_at       |             |                                                                                  | 1.228              | 2.6670     |
| 206085_s_at     | CTH         | cystathionase (cystathionine gamma-lyase)                                        | 1.228              | 4.2531     |
| 205020_s_at     | ARL4A       | ADP-ribosylation factor-like 4                                                   | 1.228              | 2.1047     |
| 210557_x_at     | CSF1        | colony stimulating factor 1 (macrophage)                                         | 1.229              | 3.5615     |
| 220835_s_at     | ZNF407      | zinc finger protein 407                                                          | 1.229              | 2.5562     |
| 204333_s_at     | AGA         | aspartylglucosaminidase                                                          | 1.229              | 1.2983     |
| 218964_at       | ARID3B      | AT rich interactive domain 3B (BRIGHT- like)                                     | 1.229              | 3.5615     |
| 221543_s_at     | SPFH2       | SPFH domain family, member 2                                                     | 1.230              | 2.6670     |
| 211439_at       | SFRS7       | splicing factor, arginine/serine-rich 7, 35kDa                                   | 1.230              | 4.2531     |
| 216340_s_at     |             |                                                                                  | 1.231              | 2.1047     |
| 205094_at       | PEX12       | peroxisomal biogenesis factor 12                                                 | 1.231              | 2.6670     |
| 202444_s_at     | SPFH1       | SPFH domain family, member 1                                                     | 1.233              | 2.5562     |
| 207702_s_at     | AIP1        | membrane associated guanylate kinase, WW and PDZ domain containing 2             | 1.234              | 4.2531     |
| 202967_at       | GSTA4       | glutathione S-transferase A4                                                     | 1.234              | 4.2531     |
| 222185_at       | PKNOX2      | PBX/knotted 1 homeobox 2                                                         | 1.235              | 1.4789     |
| 205839_s_at     | BZRAP1      | benzodiazapine receptor (peripheral) associated protein 1                        | 1.235              | 2.6670     |
| 217324_at       | EPHB1       | EPH receptor B1                                                                  | 1.236              | 2.1047     |
| 207298_at       | SLC17A3     | solute carrier family 17 (sodium phosphate), member 3                            | 1.236              | 4.2531     |
| 203650_at       | PROCR       | protein C receptor, endothelial (EPCR)                                           | 1.236              | 2.6670     |
| 205018_s_at     | MBNL2       | muscleblind-like 2 (Drosophila)                                                  | 1.237              | 2.6670     |
| 209063_x_at     | PAIP1       | poly(A) binding protein interacting protein 1                                    | 1.239              | 1.2983     |
| 216236_s_at     | SLC2A3      | solute carrier family 2 (facilitated glucose transporter), member 3              | 1.239              | 2.1047     |
| 208576_s_at     | HIST1H3B    | histone 1, H3b                                                                   | 1.240              | 3.5615     |
| 202861_at       | PER1        | period homolog 1 (Drosophila)                                                    | 1.240              | 0.6984     |
| 206651_s_at     | CPB2        | carboxypeptidase B2 (plasma, carboxypeptidase U)                                 | 1.243              | 2.1047     |
| 216482_x_at     | ZNF79       | zinc finger protein 79 (pT7)                                                     | 1.243              | 2.1047     |
| 210283_x_at     | PAIP1       | poly(A) binding protein interacting protein 1                                    | 1.245              | 3.5615     |
| 206332_s_at     | IFI16       | interferon, gamma-inducible protein 16                                           | 1.248              | 3.5615     |
| 206049_at       | SELP        | selectin P (granule membrane protein 140kDa, antigen CD62)                       | 1.249              | 3.5615     |
| 209774_x_at     | CXCL2       | chemokine (C-X-C motif) ligand 2                                                 | 1.249              | 2.1047     |
| 215001_s_at     | GLUL        | glutamate-ammonia ligase (glutamine synthase)                                    | 1.250              | 1.2983     |
| 213524_s_at     | G0S2        | putative lymphocyte G0/G1 switch gene                                            | 1.250              | 1.2983     |
| 220375_s_at     |             |                                                                                  | 1.250              | 2.5562     |
| 215798_at       | ALDH1L1     | aldehyde dehydrogenase 1 family, member L1                                       | 1.252              | 2.5562     |
| 203696_s_at     | RFC2        | replication factor C (activator 1) 2, 40kDa                                      | 1.252              | 3.5615     |
| 216268_s_at     | JAG1        | jagged 1 (Alagille syndrome)                                                     | 1.254              | 3.5615     |
| 213595_s_at     | CDC42BP     | CDC42 binding protein kinase alpha (DMPK-like)                                   | 1.254              | 1.4789     |
| 206329_at       | EXTL1       | exostoses (multiple)-like 1                                                      | 1.254              | 1.2983     |
| 219182_at       | CHST5       | carbohydrate (N-acetylglucosamine 6-O) sulfotransferase 5                        | 1.256              | 3.5615     |
| 205311_at       | DDC         | dopa decarboxylase (aromatic L-amino acid decarboxylase)                         | 1.256              | 2.5562     |
| 209970_x_at     | CASP1       | caspase 1, apoptosis-related cysteine protease (interleukin 1, beta, convertase) | 1.256              | 3.5615     |
| 206018_at       | FOXG1B      | forkhead box G1B                                                                 | 1.257              | 2.5562     |
| 207766_at       | CDKL1       | cyclin-dependent kinase-like 1 (CDC2-related kinase)                             | 1.258              | 2.5562     |
| 217954_s_at     | PHF3        | PHD finger protein 3                                                             | 1.259              | 4.2531     |
| 205112_at       | PLCE1       | phospholipase C, epsilon 1                                                       | 1.259              | 2.6670     |

| <u>Probeset</u> | <u>Gene</u> | <u>Annotation</u>                                                                           | <u>Fold Change</u> | <u>FDR</u> |
|-----------------|-------------|---------------------------------------------------------------------------------------------|--------------------|------------|
| 218881_s_at     | FOSL2       | FOS-like antigen 2                                                                          | 1.261              | 2.5562     |
| 202887_s_at     | DDIT4       | DNA-damage-inducible transcript 4                                                           | 1.261              | 2.5562     |
| 211571_s_at     | CSPG2       | chondroitin sulfate proteoglycan 2 (versican)                                               | 1.261              | 4.2531     |
| 207919_at       | ART1        | ADP-ribosyltransferase 1                                                                    | 1.262              | 2.6670     |
| 209958_s_at     | B1          | parathyroid hormone-responsive B1 gene                                                      | 1.262              | 1.4789     |
| 204296_at       | SLC4A5      | solute carrier family 4, sodium bicarbonate cotransporter, member 5                         | 1.262              | 2.5562     |
| 218582_at       | 5-Mar       | membrane-associated ring finger (C3HC4) 5                                                   | 1.262              | 2.5562     |
| 216824_at       |             |                                                                                             | 1.262              | 4.2531     |
| 206857_s_at     | FKBP1B      | FK506 binding protein 1B, 12.6 kDa                                                          | 1.262              | 4.2531     |
| 221053_s_at     | TDRKH       | tudor and KH domain containing                                                              | 1.264              | 3.5615     |
| 204749_at       | NAP1L3      | nucleosome assembly protein 1-like 3                                                        | 1.269              | 4.2531     |
| 209099_x_at     | JAG1        | jagged 1 (Alagille syndrome)                                                                | 1.270              | 4.2531     |
| 209185_s_at     | IRS2        | insulin receptor substrate 2                                                                | 1.271              | 1.2983     |
| 204767_s_at     | FEN1        | flap structure-specific endonuclease 1                                                      | 1.272              | 0.6984     |
| 56821_at        | FLJ10815    | amino acid transporter                                                                      | 1.272              | 4.2531     |
| 214584_x_at     |             |                                                                                             | 1.273              | 2.6670     |
| 213608_s_at     |             |                                                                                             | 1.275              | 0.0000     |
| 207524_at       | ST7         | suppression of tumorigenicity 7                                                             | 1.275              | 1.2983     |
| 219391_at       | BPNT1       | 3'(2'), 5'-bisphosphate nucleotidase 1                                                      | 1.277              | 2.5562     |
| 213844_at       | HOXA5       | homeo box A5                                                                                | 1.279              | 4.2531     |
| 202081_at       | IER2        | immediate early response 2                                                                  | 1.281              | 1.4789     |
| 209545_s_at     | RIPK2       | receptor-interacting serine-threonine kinase 2                                              | 1.282              | 1.2983     |
| 202826_at       | SPINT1      | serine protease inhibitor, Kunitz type 1                                                    | 1.283              | 1.4789     |
| 214557_at       | PTTG2       | pituitary tumor-transforming 2                                                              | 1.284              | 2.6670     |
| 48659_at        | FLJ12438    | hypothetical protein FLJ12438                                                               | 1.286              | 2.6670     |
| 210050_at       | TPI1        | triosephosphate isomerase 1                                                                 | 1.286              | 4.2531     |
| 216683_at       | TBCA        | tubulin-specific chaperone a                                                                | 1.287              | 3.5615     |
| 202916_s_at     | FAM20B      | family with sequence similarity 20, member B                                                | 1.289              | 2.6670     |
| 209551_at       | MGC1106     | hypothetical protein MGC11061                                                               | 1.292              | 4.2531     |
| 200732_s_at     | PTP4A1      | protein tyrosine phosphatase type IVA, member 1                                             | 1.292              | 0.6984     |
| 32540_at        | PPP3CC      | protein phosphatase 3 (formerly 2B), catalytic subunit, gamma isoform (calcineurin A gamma) | 1.295              | 1.2983     |
| 211668_s_at     | PLAU        | plasminogen activator, urokinase                                                            | 1.297              | 3.5615     |
| 210746_s_at     | EPB42       | erythrocyte membrane protein band 4.2                                                       | 1.298              | 2.1047     |
| 214211_at       | FTH1        | ferritin, heavy polypeptide 1                                                               | 1.299              | 2.5562     |
| 216243_s_at     | IL1RN       | interleukin 1 receptor antagonist                                                           | 1.300              | 1.2983     |
| 218332_at       | BEX1        | brain expressed, X-linked 1                                                                 | 1.302              | 2.6670     |
| 220239_at       | KLHL7       | kelch-like 7 (Drosophila)                                                                   | 1.303              | 3.5615     |
| 211497_x_at     | NKX3-1      | NK3 transcription factor related, locus 1 (Drosophila)                                      | 1.305              | 2.6670     |
| 216479_at       | RPL21       | ribosomal protein L21                                                                       | 1.305              | 0.4049     |
| 213375_s_at     | CG018       | hypothetical gene CG018                                                                     | 1.307              | 0.4049     |
| 218646_at       | FLJ20534    | hypothetical protein FLJ20534                                                               | 1.308              | 1.4789     |
| 221294_at       | GPR21       | G protein-coupled receptor 21                                                               | 1.309              | 2.6670     |
| 218788_s_at     | SMYD3       | SET and MYND domain containing 3                                                            | 1.311              | 3.5615     |
| 210567_s_at     | SKP2        | S-phase kinase-associated protein 2 (p45)                                                   | 1.311              | 2.1047     |
| 205493_s_at     | DPYSL4      | dihydropyrimidinase-like 4                                                                  | 1.313              | 0.6984     |
| 217300_at       |             |                                                                                             | 1.315              | 1.2983     |
| 202814_s_at     | HIS1        | hexamethylene bis-acetamide inducible 1                                                     | 1.316              | 2.5562     |
| 214874_at       |             |                                                                                             | 1.316              | 2.6670     |
| 206344_at       | PON1        | paraoxonase 1                                                                               | 1.319              | 2.5562     |
| 204032_at       | BCAR3       | breast cancer anti-estrogen resistance 3                                                    | 1.319              | 2.5562     |
| 218170_at       | ISOC1       | isochorismatase domain containing 1                                                         | 1.320              | 2.6670     |
| 219448_at       | FLJ20533    | hypothetical protein FLJ20533                                                               | 1.322              | 4.2531     |
| 204457_s_at     | GAS1        | growth arrest-specific 1                                                                    | 1.322              | 1.2983     |
| 216635_at       |             |                                                                                             | 1.326              | 3.5615     |
| 204149_s_at     | GSTM4       | glutathione S-transferase M4                                                                | 1.330              | 2.6670     |
| 217395_at       | MT4         | metallothionein IV                                                                          | 1.330              | 4.2531     |
| 210674_s_at     | PCDHA12     | protocadherin alpha 12                                                                      | 1.332              | 1.4789     |
| 219735_s_at     | TFCP2L1     | transcription factor CP2-like 1                                                             | 1.333              | 4.2531     |
| 210511_s_at     | INHBA       | inhibin, beta A (activin A, activin AB alpha polypeptide)                                   | 1.333              | 2.5562     |
| 203708_at       | PDE4B       | phosphodiesterase 4B, cAMP-specific (phosphodiesterase E4 dunce homolog, Drosophila)        | 1.336              | 1.2983     |
| 205151_s_at     | KIAA0644    | KIAA0644 gene product                                                                       | 1.340              | 3.5615     |
| 209740_s_at     | PNPLA4      | patatin-like phospholipase domain containing 4                                              | 1.342              | 3.5615     |
| 203313_s_at     | TGIF        | TGFB-induced factor (TALE family homeobox)                                                  | 1.343              | 2.1047     |
| 219928_s_at     | CABYR       | calcium-binding tyrosine-(Y)-phosphorylation regulated (fibrousheathin 2)                   | 1.345              | 3.5615     |
| 213362_at       | PTPRD       | protein tyrosine phosphatase, receptor type, D                                              | 1.348              | 2.6670     |
| 201751_at       | KIAA0063    | KIAA0063 gene product                                                                       | 1.349              | 1.4789     |
| 216531_at       | MBTPS2      | membrane-bound transcription factor protease, site 2                                        | 1.349              | 3.5615     |

| <u>Probeset</u>    | <u>Gene</u>  | <u>Annotation</u>                                                                            | <u>Fold Change</u> | <u>FDR</u>    |
|--------------------|--------------|----------------------------------------------------------------------------------------------|--------------------|---------------|
| 203397_s_at        | GALNT3       | UDP-N-acetyl-alpha-D-galactosamine:polypeptide N-acetylgalactosaminyltransferase 3 (GalNAc-T | 1.350              | 3.5615        |
| 216337_at          |              |                                                                                              | 1.352              | 2.6670        |
| 207716_at          | KRTHA8       | keratin, hair, acidic, 8                                                                     | 1.352              | 2.1047        |
| 204912_at          | IL10RA       | interleukin 10 receptor, alpha                                                               | 1.353              | 0.0000        |
| 221714_s_at        | LOC94431     | similar to RNA polymerase I transcription factor RRN3                                        | 1.354              | 3.5615        |
| 216544_at          | RBMY2FP      | RNA binding motif protein, Y-linked, family 2, member F pseudogene                           | 1.355              | 0.6984        |
| 202284_s_at        | CDKN1A       | cyclin-dependent kinase inhibitor 1A (p21, Cip1)                                             | 1.356              | 2.5562        |
| 202497_x_at        | SLC2A3       | solute carrier family 2 (facilitated glucose transporter), member 3                          | 1.357              | 3.5615        |
| 202464_s_at        | PFKFB3       | 6-phosphofructo-2-kinase/fructose-2,6-biphosphatase 3                                        | 1.361              | 3.5615        |
| 212981_s_at        | KIAA0738     | KIAA0738 gene product                                                                        | 1.363              | 2.1047        |
| 215169_at          | SLC35E2      | solute carrier family 35, member E2                                                          | 1.363              | 2.6670        |
| 203140_at          | BCL6         | B-cell CLL/lymphoma 6 (zinc finger protein 51)                                               | 1.365              | 0.0000        |
| 216809_at          | CYLC1        | cylicin, basic protein of sperm head cytoskeleton 1                                          | 1.366              | 2.6670        |
| 220298_s_at        | SPATA6       | spermatogenesis associated 6                                                                 | 1.367              | 2.5562        |
| 204563_at          | SELL         | selectin L (lymphocyte adhesion molecule 1)                                                  | 1.368              | 0.4049        |
| 213401_s_at        |              |                                                                                              | 1.368              | 3.5615        |
| 216893_s_at        | COL4A3       | collagen, type IV, alpha 3 (Goodpasture antigen)                                             | 1.373              | 3.5615        |
| 206869_at          | CHAD         | chondroadherin                                                                               | 1.373              | 4.2531        |
| 209388_at          | PAPOLA       | poly(A) polymerase alpha                                                                     | 1.376              | 4.2531        |
| 205482_x_at        | SNX15        | sorting nexin 15                                                                             | 1.377              | 0.4049        |
| 59705_at           | SCLY         | selenocysteine lyase                                                                         | 1.377              | 0.0000        |
| 217028_at          | CXCR4        | chemokine (C-X-C motif) receptor 4                                                           | 1.382              | 0.0000        |
| 208096_s_at        | COL21A1      | collagen, type XXI, alpha 1                                                                  | 1.384              | 4.2531        |
| 205214_at          | STK17B       | serine/threonine kinase 17b (apoptosis-inducing)                                             | 1.385              | 3.5615        |
| 220669_at          | HSHIN1       | HIV-1 induced protein HIN-1                                                                  | 1.387              | 3.5615        |
| 205347_s_at        | TMSL8        | thymosin-like 8                                                                              | 1.388              | 2.5562        |
| 221370_at          | LOC37706     | kruppel-like zinc finger factor X17                                                          | 1.395              | 2.6670        |
| 200798_x_at        | MCL1         | myeloid cell leukemia sequence 1 (BCL2-related)                                              | 1.396              | 0.0000        |
| 204421_s_at        | FGF2         | fibroblast growth factor 2 (basic)                                                           | 1.397              | 2.6670        |
| 215405_at          | MYO1E        | myosin IE                                                                                    | 1.397              | 3.5615        |
| 217442_at          | IGSF4B       | immunoglobulin superfamily, member 4B                                                        | 1.403              | 2.6670        |
| 214184_at          | NPFF         | neuropeptide FF-amide peptide precursor                                                      | 1.414              | 1.4789        |
| 216203_at          | SPTLC2       | serine palmitoyltransferase, long chain base subunit 2                                       | 1.417              | 2.6670        |
| 205476_at          | CCL20        | chemokine (C-C motif) ligand 20                                                              | 1.428              | 0.0000        |
| 202843_at          | DNAJB9       | DnaJ (Hsp40) homolog, subfamily B, member 9                                                  | 1.430              | 2.5562        |
| 205509_at          | CPB1         | carboxypeptidase B1 (tissue)                                                                 | 1.431              | 2.6670        |
| 209201_x_at        | CXCR4        | chemokine (C-X-C motif) receptor 4                                                           | 1.434              | 0.0000        |
| 214117_s_at        | BTB          | biotinidase                                                                                  | 1.435              | 2.5562        |
| 201170_s_at        | BHLHB2       | basic helix-loop-helix domain containing, class B, 2                                         | 1.438              | 0.0000        |
| 209967_s_at        | CREM         | cAMP responsive element modulator                                                            | 1.444              | 2.6670        |
| 212724_at          | RND3         | Rho family GTPase 3                                                                          | 1.445              | 0.4049        |
| 211919_s_at        | CXCR4        | chemokine (C-X-C motif) receptor 4                                                           | 1.446              | 1.2983        |
| 210845_s_at        | PLAUR        | plasminogen activator, urokinase receptor                                                    | 1.448              | 2.1047        |
| 209160_at          | AKR1C3       | aldo-keto reductase family 1, member C3 (3-alpha hydroxysteroid dehydrogenase, type II)      | 1.452              | 3.5615        |
| 203574_at          | NFIL3        | nuclear factor, interleukin 3 regulated                                                      | 1.464              | 2.5562        |
| 207433_at          | IL10         | interleukin 10                                                                               | 1.474              | 2.5562        |
| 203705_s_at        | FZD7         | frizzled homolog 7 (Drosophila)                                                              | 1.477              | 1.2983        |
| 206919_at          | ELK4         | ELK4, ETS-domain protein (SRF accessory protein 1)                                           | 1.481              | 3.5615        |
| 209039_x_at        | EHD1         | EH-domain containing 1                                                                       | 1.488              | 0.0000        |
| 219889_at          | FRAT1        | frequently rearranged in advanced T-cell lymphomas                                           | 1.497              | 0.0000        |
| 200733_s_at        | PTP4A1       | protein tyrosine phosphatase type IVA, member 1                                              | 1.500              | 4.2531        |
| 207265_s_at        | KDELRL3      | KDEL (Lys-Asp-Glu-Leu) endoplasmic reticulum protein retention receptor 3                    | 1.501              | 2.6670        |
| <b>204015_s_at</b> | <b>DUSP4</b> | <b>dual specificity phosphatase 4</b>                                                        | <b>1.513</b>       | <b>0.0000</b> |
| 208112_x_at        | EHD1         | EH-domain containing 1                                                                       | 1.513              | 2.1047        |
| 211003_x_at        | TGM2         | transglutaminase 2 (C polypeptide, protein-glutamine-gamma-glutamyltransferase)              | 1.521              | 2.5562        |
| 205430_at          | BMP5         | bone morphogenetic protein 5                                                                 | 1.527              | 3.5615        |
| 206104_at          | ISL1         | ISL1 transcription factor, LIM/homeodomain, (islet-1)                                        | 1.530              | 2.5562        |
| 215694_at          | SPATA5L1     | spermatogenesis associated 5-like 1                                                          | 1.530              | 1.2983        |
| 219643_at          | LRP1B        | low density lipoprotein-related protein 1B (deleted in tumors)                               | 1.531              | 4.2531        |
| 206626_x_at        | SSX1         | synovial sarcoma, X breakpoint 1                                                             | 1.534              | 3.5615        |
| 203706_s_at        | FZD7         | frizzled homolog 7 (Drosophila)                                                              | 1.537              | 0.4049        |
| 205479_s_at        | PLAU         | plasminogen activator, urokinase                                                             | 1.542              | 0.0000        |
| 222221_x_at        | EHD1         | EH-domain containing 1                                                                       | 1.549              | 1.2983        |
| 216504_s_at        | SLC39A8      | solute carrier family 39 (zinc transporter), member 8                                        | 1.550              | 4.2531        |
| 205141_at          | ANG          | angiogenin, ribonuclease, RNase A family, 5                                                  | 1.559              | 0.4049        |
| 221841_s_at        | KLF4         | Kruppel-like factor 4 (gut)                                                                  | 1.564              | 0.0000        |
| 218880_at          | FOSL2        | FOS-like antigen 2                                                                           | 1.567              | 1.2983        |



| <u>Probeset</u>    | <u>Gene</u>  | <u>Annotation</u>                                                                              | <u>Fold Change</u> | <u>FDR</u>    |
|--------------------|--------------|------------------------------------------------------------------------------------------------|--------------------|---------------|
| 201473_at          | JUNB         | jun B proto-oncogene                                                                           | 1.591              | 0.4049        |
| 222002_at          | C7orf26      | chromosome 7 open reading frame 26                                                             | 1.616              | 0.4049        |
| 205207_at          | IL6          | interleukin 6 (interferon, beta 2)                                                             | 1.620              | 0.4049        |
| 214058_at          | MYCL1        | v-myc myelocytomatosis viral oncogene homolog 1, lung carcinoma derived (avian)                | 1.628              | 0.0000        |
| 220088_at          | C5R1         | complement component 5 receptor 1 (C5a ligand)                                                 | 1.638              | 0.4049        |
| 216979_at          | NR4A3        | nuclear receptor subfamily 4, group A, member 3                                                | 1.644              | 0.4049        |
| 209112_at          | CDKN1B       | cyclin-dependent kinase inhibitor 1B (p27, Kip1)                                               | 1.663              | 1.2983        |
| 217168_s_at        | HERPUD1      | homocysteine-inducible, endoplasmic reticulum stress-inducible, ubiquitin-like domain member 1 | 1.672              | 0.0000        |
| 208415_x_at        | ING1         | inhibitor of growth family, member 1                                                           | 1.674              | 0.4049        |
| 202241_at          | TRIB1        | tribbles homolog 1 (Drosophila)                                                                | 1.687              | 0.0000        |
| 209808_x_at        | ING1         | inhibitor of growth family, member 1                                                           | 1.690              | 0.0000        |
| 219371_s_at        | KLF2         | Kruppel-like factor 2 (lung)                                                                   | 1.717              | 0.0000        |
| 210538_s_at        | BIRC3        | baculoviral IAP repeat-containing 3                                                            | 1.723              | 2.1047        |
| 215743_at          | NMT2         | N-myristoyltransferase 2                                                                       | 1.730              | 2.1047        |
| <b>204014_at</b>   | <b>DUSP4</b> | <b>dual specificity phosphatase 4</b>                                                          | <b>1.732</b>       | <b>1.4789</b> |
| 210242_x_at        | MTHFS        | 5,10-methenyltetrahydrofolate synthetase (5-formyltetrahydrofolate cyclo-ligase)               | 1.748              | 1.4789        |
| 217738_at          | PBEF1        | pre-B-cell colony enhancing factor 1                                                           | 1.768              | 0.0000        |
| 219622_at          | RAB20        | RAB20, member RAS oncogene family                                                              | 1.798              | 0.4049        |
| 202672_s_at        | ATF3         | activating transcription factor 3                                                              | 1.815              | 0.0000        |
| 217739_s_at        | PBEF1        | pre-B-cell colony enhancing factor 1                                                           | 1.825              | 0.0000        |
| <b>204794_at</b>   | <b>DUSP2</b> | <b>dual specificity phosphatase 2</b>                                                          | <b>1.849</b>       | <b>0.0000</b> |
| 214056_at          | MCL1         | myeloid cell leukemia sequence 1 (BCL2-related)                                                | 1.873              | 2.1047        |
| 39402_at           | IL1B         | interleukin 1, beta                                                                            | 1.909              | 0.0000        |
| 203395_s_at        | HES1         | hairly and enhancer of split 1, (Drosophila)                                                   | 1.980              | 0.0000        |
| 205067_at          | IL1B         | interleukin 1, beta                                                                            | 2.032              | 0.0000        |
| 206907_at          | TNFSF9       | tumor necrosis factor (ligand) superfamily, member 9                                           | 2.064              | 0.0000        |
| 209189_at          | FOS          | v-fos FBJ murine osteosarcoma viral oncogene homolog                                           | 2.173              | 1.4789        |
| 201565_s_at        | ID2          | inhibitor of DNA binding 2, dominant negative helix-loop-helix protein                         | 2.176              | 0.0000        |
| 210911_at          | ID2B         | inhibitor of DNA binding 2B, dominant negative helix-loop-helix protein                        | 2.207              | 1.2983        |
| 203821_at          | HBEGF        | heparin-binding EGF-like growth factor                                                         | 2.287              | 1.2983        |
| 38037_at           | HBEGF        | heparin-binding EGF-like growth factor                                                         | 2.326              | 0.0000        |
| 209795_at          | CD69         | CD69 antigen (p60, early T-cell activation antigen)                                            | 2.349              | 0.0000        |
| 212099_at          | RHOB         | ras homolog gene family, member B                                                              | 2.371              | 0.0000        |
| 201566_x_at        | ID2          | inhibitor of DNA binding 2, dominant negative helix-loop-helix protein                         | 2.482              | 0.0000        |
| 202393_s_at        | KLF10        | Kruppel-like factor 10                                                                         | 2.506              | 0.0000        |
| 205681_at          | BCL2A1       | BCL2-related protein A1                                                                        | 2.671              | 0.0000        |
| 220054_at          | IL23A        | interleukin 23, alpha subunit p19                                                              | 2.707              | 0.0000        |
| 218631_at          | AVPI1        | arginine vasopressin-induced 1                                                                 | 2.716              | 0.0000        |
| 209325_s_at        | RGS16        | regulator of G-protein signalling 16                                                           | 2.834              | 0.0000        |
| 202704_at          | TOB1         | transducer of ERBB2, 1                                                                         | 2.852              | 0.0000        |
| 202340_x_at        | NR4A1        | nuclear receptor subfamily 4, group A, member 1                                                | 3.046              | 0.0000        |
| 213931_at          | ID2          | inhibitor of DNA binding 2, dominant negative helix-loop-helix protein                         | 3.155              | 0.4049        |
| 215491_at          | MYCL1        | v-myc myelocytomatosis viral oncogene homolog 1, lung carcinoma derived (avian)                | 3.157              | 0.0000        |
| 205220_at          | GPR109B      | G protein-coupled receptor 109B                                                                | 3.230              | 0.0000        |
| 204748_at          | PTGS2        | prostaglandin-endoperoxide synthase 2 (prostaglandin G/H synthase and cyclooxygenase)          | 3.325              | 0.0000        |
| 209324_s_at        | RGS16        | regulator of G-protein signalling 16                                                           | 3.350              | 0.0000        |
| 211143_x_at        | NR4A1        | nuclear receptor subfamily 4, group A, member 1                                                | 3.390              | 0.0000        |
| 205266_at          | LIF          | leukemia inhibitory factor (cholinergic differentiation factor)                                | 3.531              | 0.0000        |
| 219480_at          | SNAI1        | snail homolog 1 (Drosophila)                                                                   | 3.554              | 0.0000        |
| 205419_at          | EBI2         | Epstein-Barr virus induced gene 2 (lymphocyte-specific G protein-coupled receptor)             | 3.843              | 0.0000        |
| 212657_s_at        | IL1RN        | interleukin 1 receptor antagonist                                                              | 4.163              | 0.0000        |
| 210118_s_at        | IL1A         | interleukin 1, alpha                                                                           | 4.178              | 0.0000        |
| <b>201041_s_at</b> | <b>DUSP1</b> | <b>dual specificity phosphatase 1</b>                                                          | <b>4.265</b>       | <b>0.0000</b> |
| 205239_at          | AREG         | amphiregulin (schwannoma-derived growth factor)                                                | 5.212              | 0.0000        |
| 202988_s_at        | RGS1         | regulator of G-protein signalling 1                                                            | 5.579              | 0.0000        |
| 201110_s_at        | THBS1        | thrombospondin 1                                                                               | 6.583              | 0.0000        |
| 208078_s_at        | SNF1LK       | SNF1-like kinase                                                                               | 7.674              | 0.0000        |
| 216834_at          |              |                                                                                                | 7.966              | 0.0000        |
| 202768_at          | FOSB         | FBJ murine osteosarcoma viral oncogene homolog B                                               | 8.321              | 0.0000        |
| 202388_at          | RGS2         | regulator of G-protein signalling 2, 24kDa                                                     | 9.336              | 0.0000        |
| 212977_at          | CMKOR1       | chemokine orphan receptor 1                                                                    | 11.423             | 0.0000        |
| 204621_s_at        | NR4A2        | nuclear receptor subfamily 4, group A, member 2                                                | 12.444             | 0.0000        |
| 204622_x_at        | NR4A2        | nuclear receptor subfamily 4, group A, member 2                                                | 13.252             | 0.0000        |
| 216248_s_at        | NR4A2        | nuclear receptor subfamily 4, group A, member 2                                                | 13.401             | 0.0000        |
